# Supplementary material for: The Antitumor Effect of Caffeic Acid Phenethyl Ester by Downregulating Mucosa-Associated Lymphoid Tissue 1 via AR/p53/NF-κB Signaling in Prostate Carcinoma Cells
Source: MDPI journal article supplement (doi:10.3390/cancers14020274), 2022-01-06
Supplement: s1 [file s1]

## PC3

CAPE      0      3      10      30      (uM)

MALT1 92kD

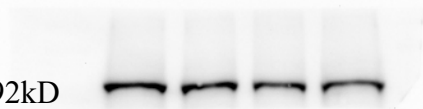

NDRG1 43kD

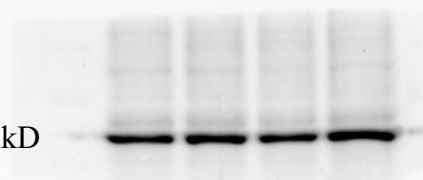

Actin 43kD



## PC3

CAPE      0      3      10      30      (uM)

55-  
40-

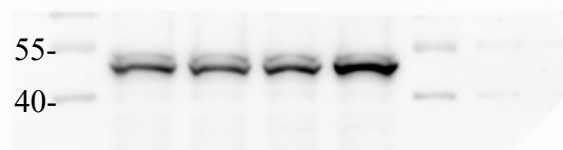

Actin 43kD

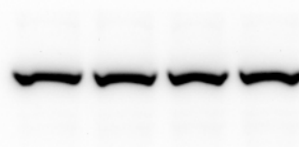

PC3

CAPE      0      3      10      30      (uM)

MALT1 92kD

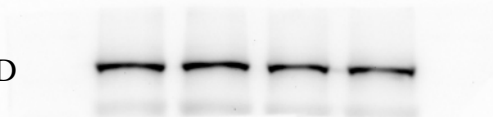

NDRG1 43kD

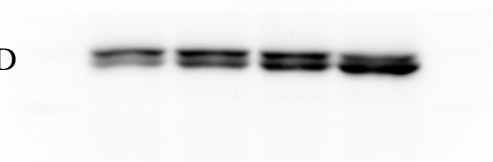

Actin 43kD

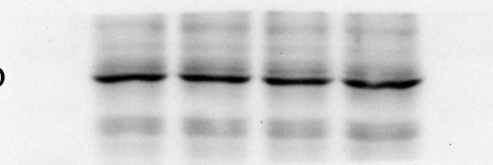

PC3

CAPE      0      3      10      30      (uM)

MALT1 92kD

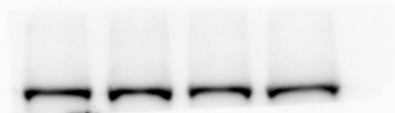

NDRG1 43kD

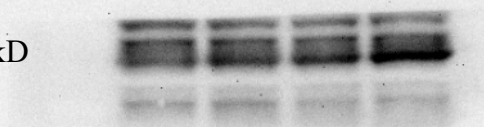

Actin 43kD

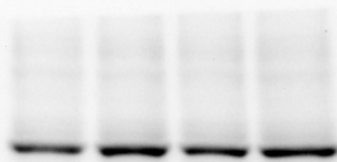

## Cytosol extract

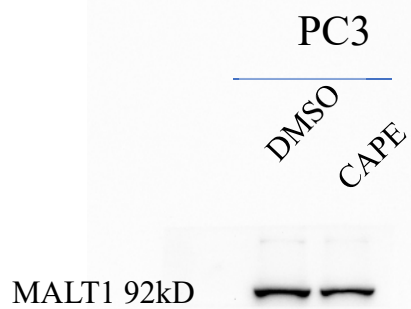

## Nuclear extract

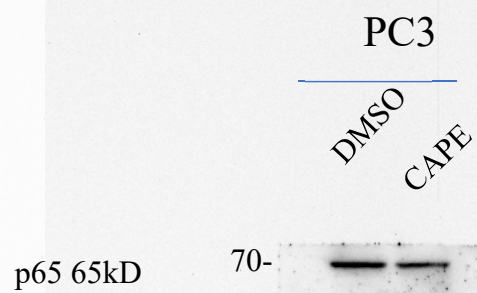

p-IkB $\alpha$  40kD

40-

35-

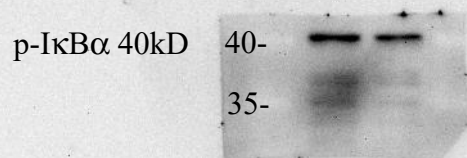

p50 50kD

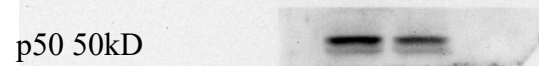

IkB $\alpha$  39kD

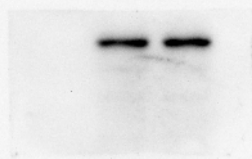

Lamin B1 68kD

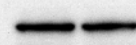

GAPDH 37kD

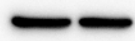

DU145

CAPE 0 3 10 30 (uM)

MALT1 92kD

100-  
70-

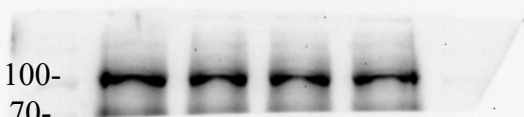

NDRG1 43kD

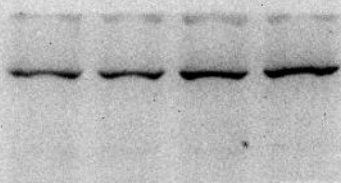

Actin 43kD

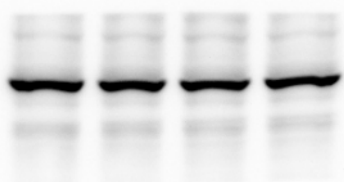

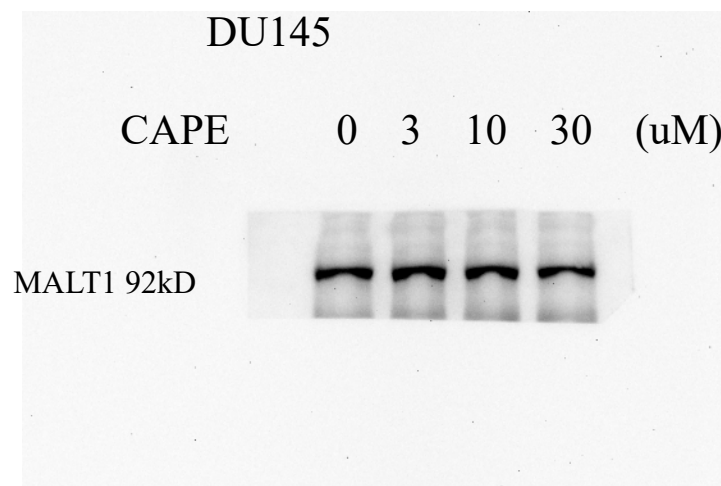

Actin 43kD

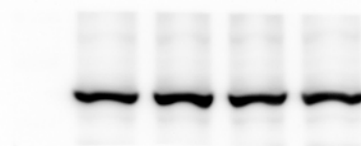

NDRG1 43kD

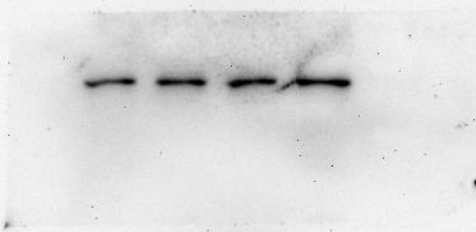

Actin 43kD

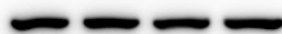

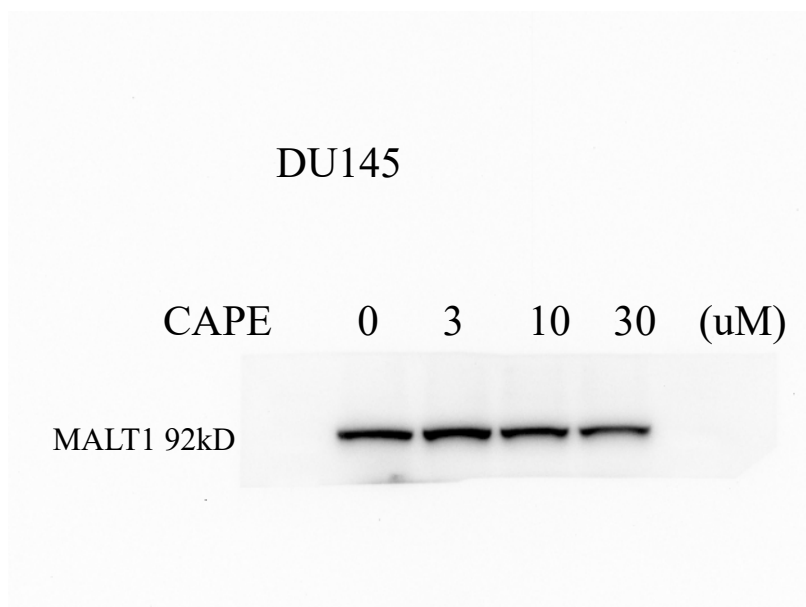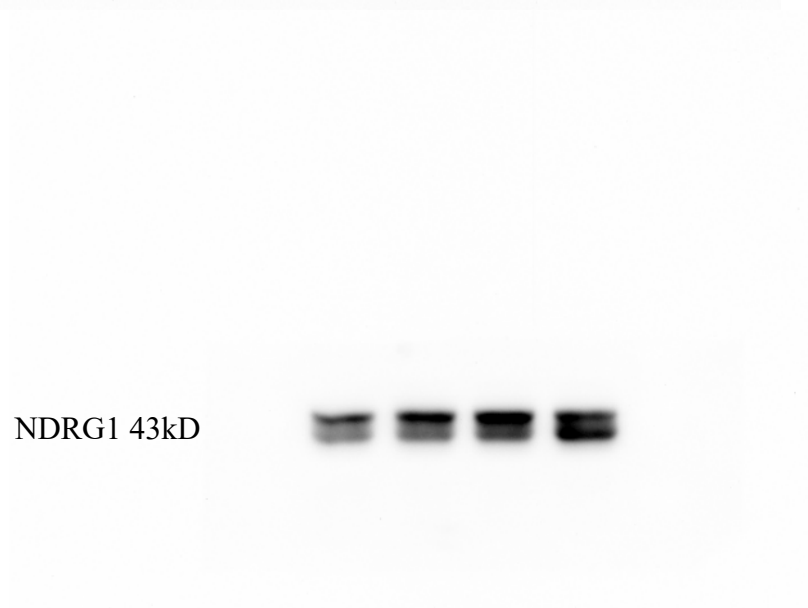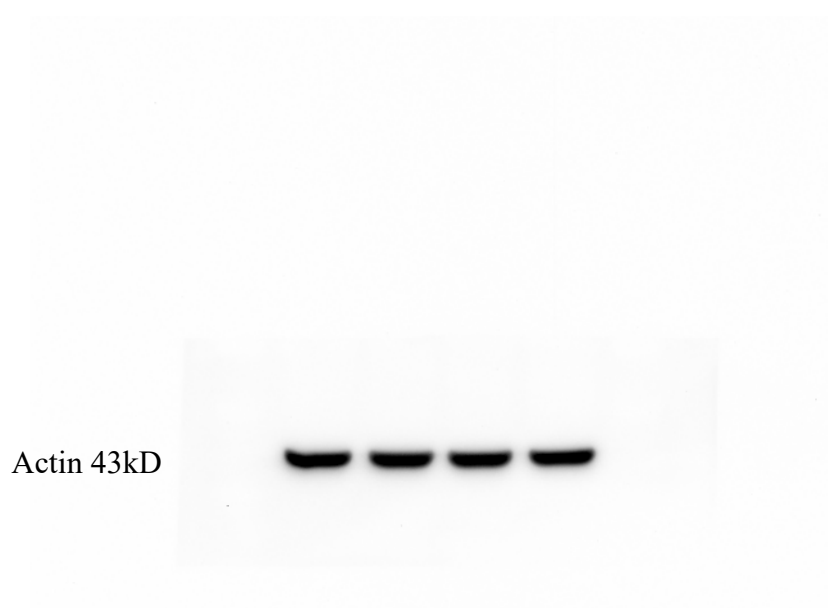

**Figure S3:** Original uncropped Western blots of figure 3
