# Supplementary material for: The Antitumor Effect of Caffeic Acid Phenethyl Ester by Downregulating Mucosa-Associated Lymphoid Tissue 1 via AR/p53/NF-κB Signaling in Prostate Carcinoma Cells
Source: MDPI journal article supplement (doi:10.3390/cancers14020274), 2022-01-06
Supplement: s1 [file s1]

# PC3

CAPE (30) 0 15 30 60 (min)

p-Erk 42/44 kD

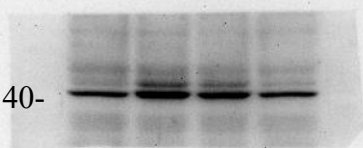

p-JNK 46/54 kD

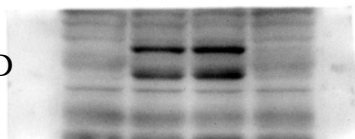

ErK 42/44 kD

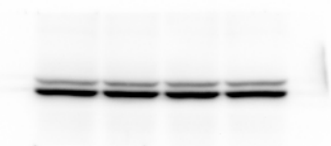

JNK 46/54 kD

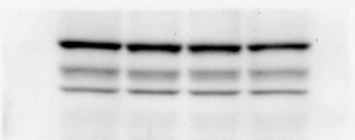

p-p38 38kD

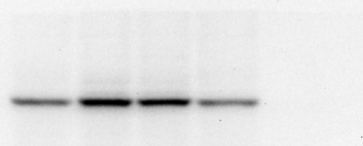

p-AMPK 62 kD

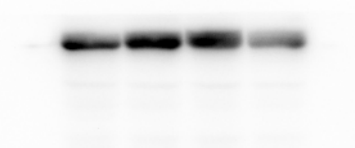

p38 38kD

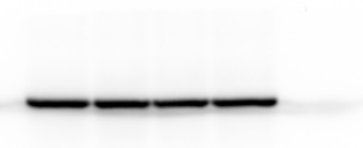

AMPK 62 kD

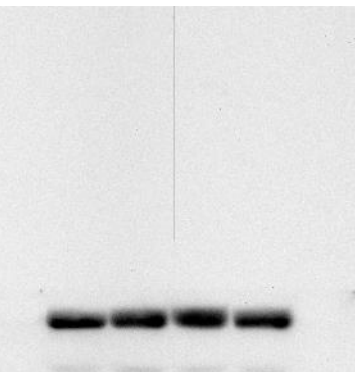

PC3

CAPE (30)      0    15    30    60    (min)

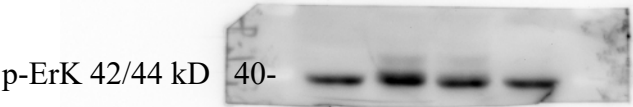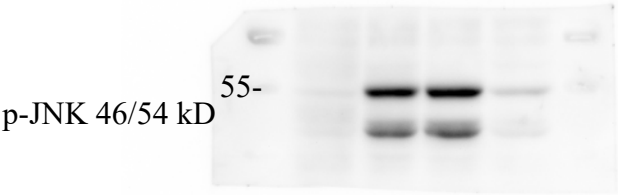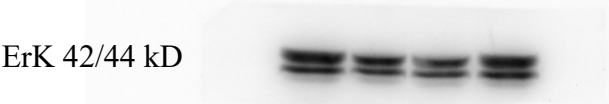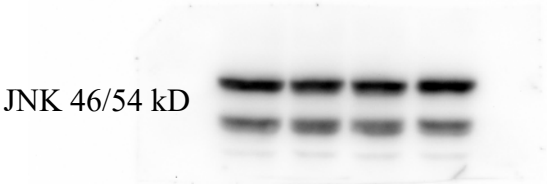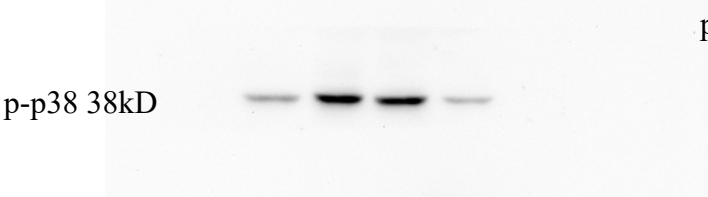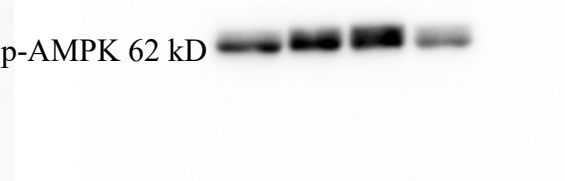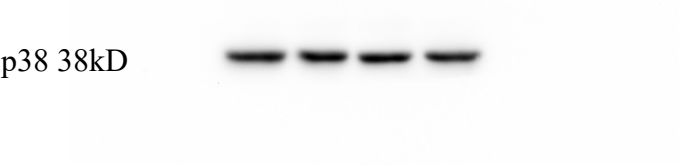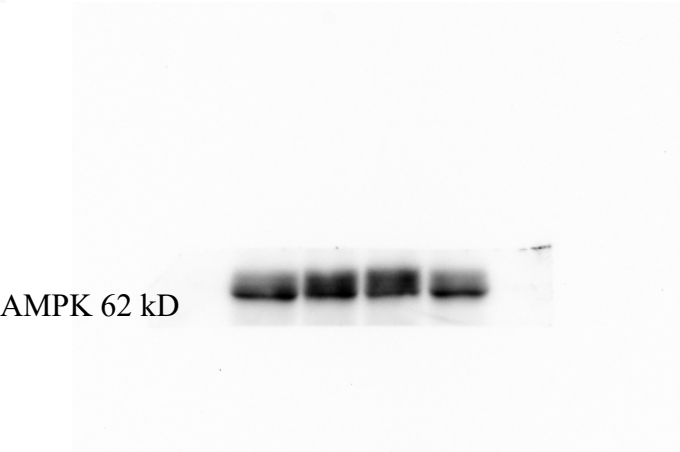

# PC3

CAPE (30)      0    15    30    60    (min)

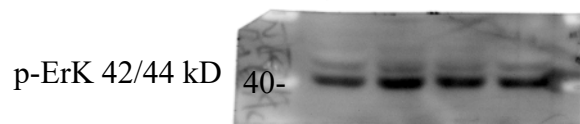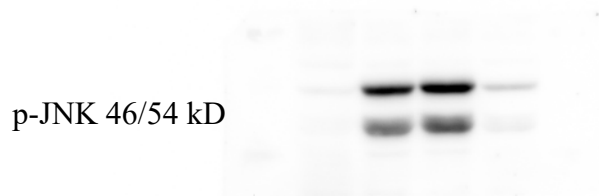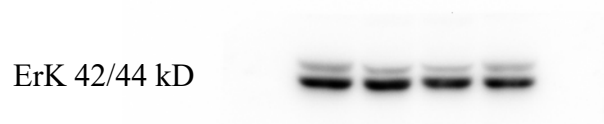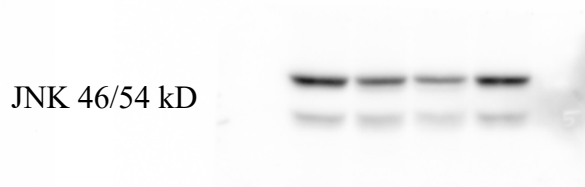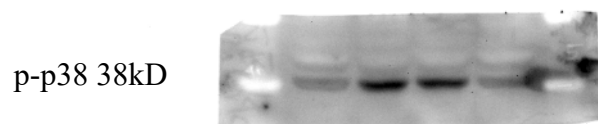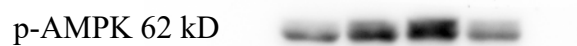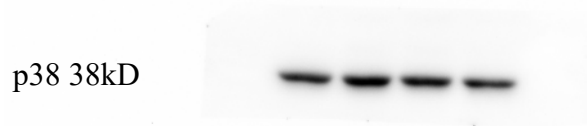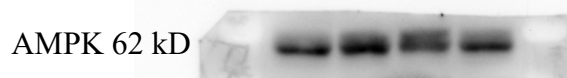

# PC3

CAPE (30 min)      0    3    10    30    (uM)

p-Erk 42/44 kD

40-

p-JNK 46/54 kD

ErK 42/44 kD

40-

JNK 46/54 kD

p-p38 38kD

40-

p-AMPK 62 kD

p38 38kD

AMPK 62 kD

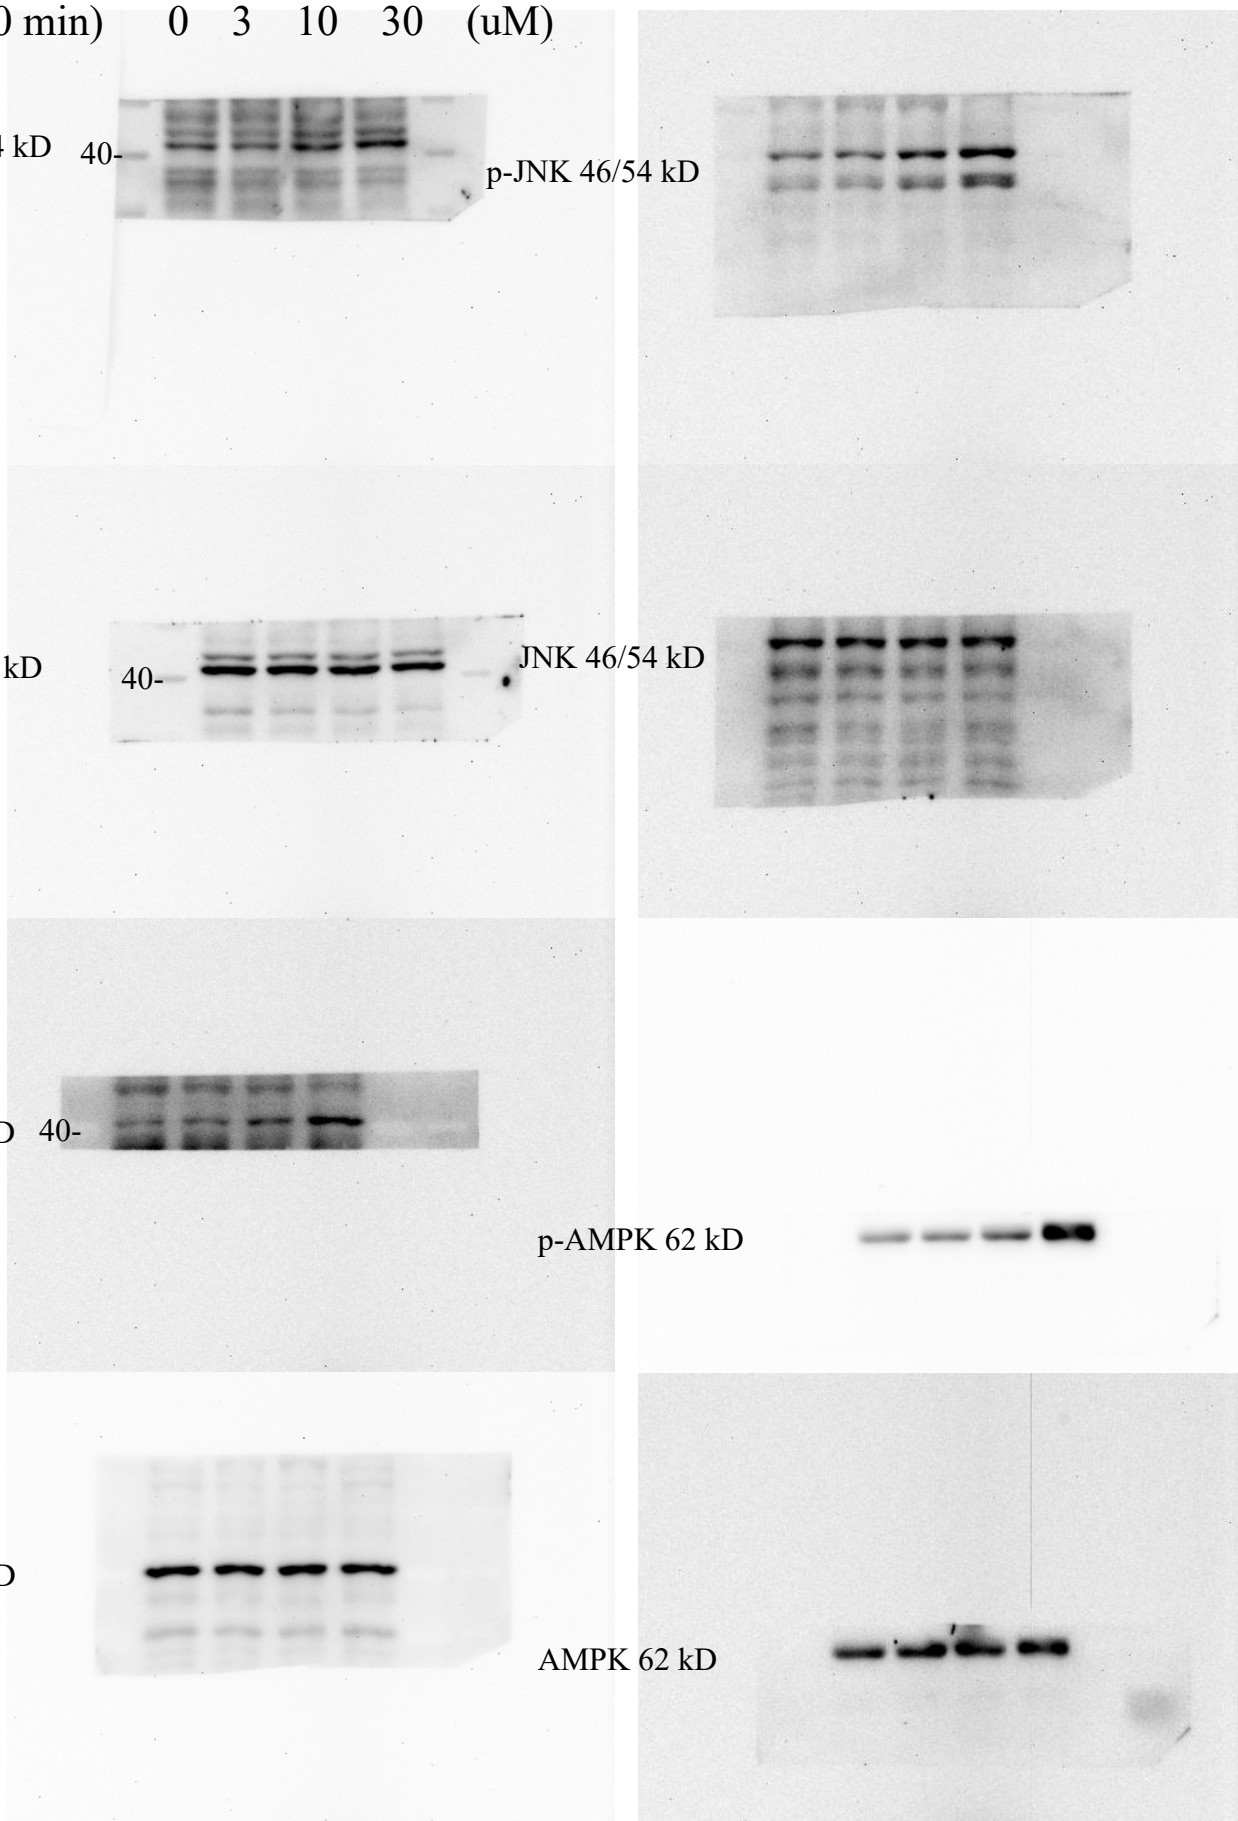

PC3

CAPE (30 min)      0    3    10 30    (uM)

p-ErK 42/44 kD

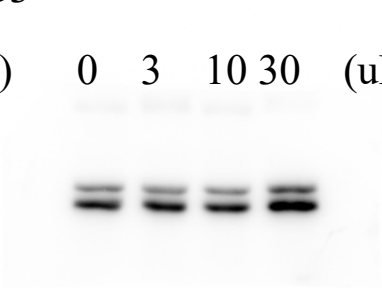

p-JNK 46/54 kD

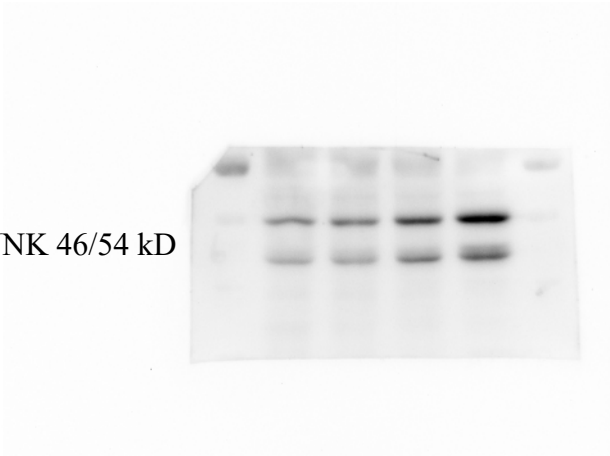

ErK 42/44 kD

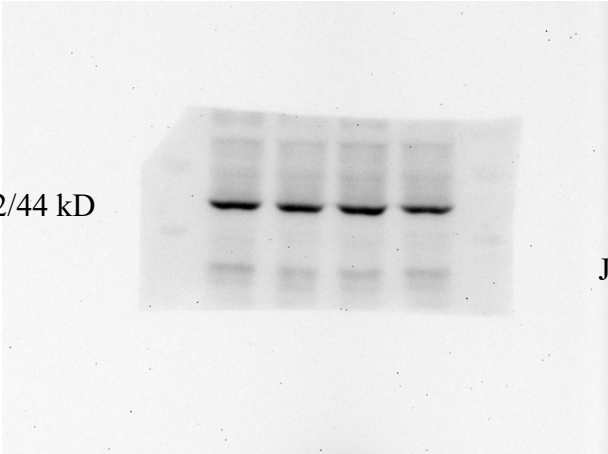

JNK 46/54 kD

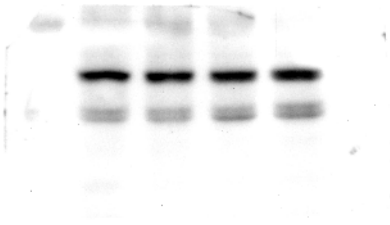

p-p38 38kD

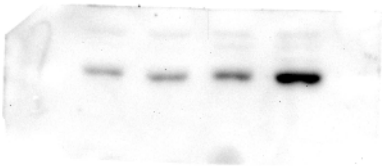

p-AMPK 62 kD

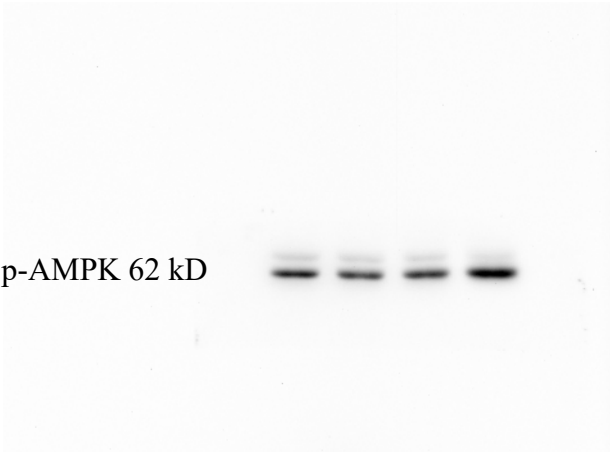

p38 38kD

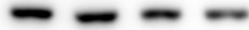

AMPK 62 kD

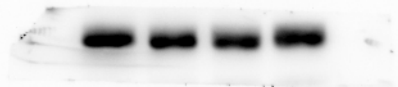

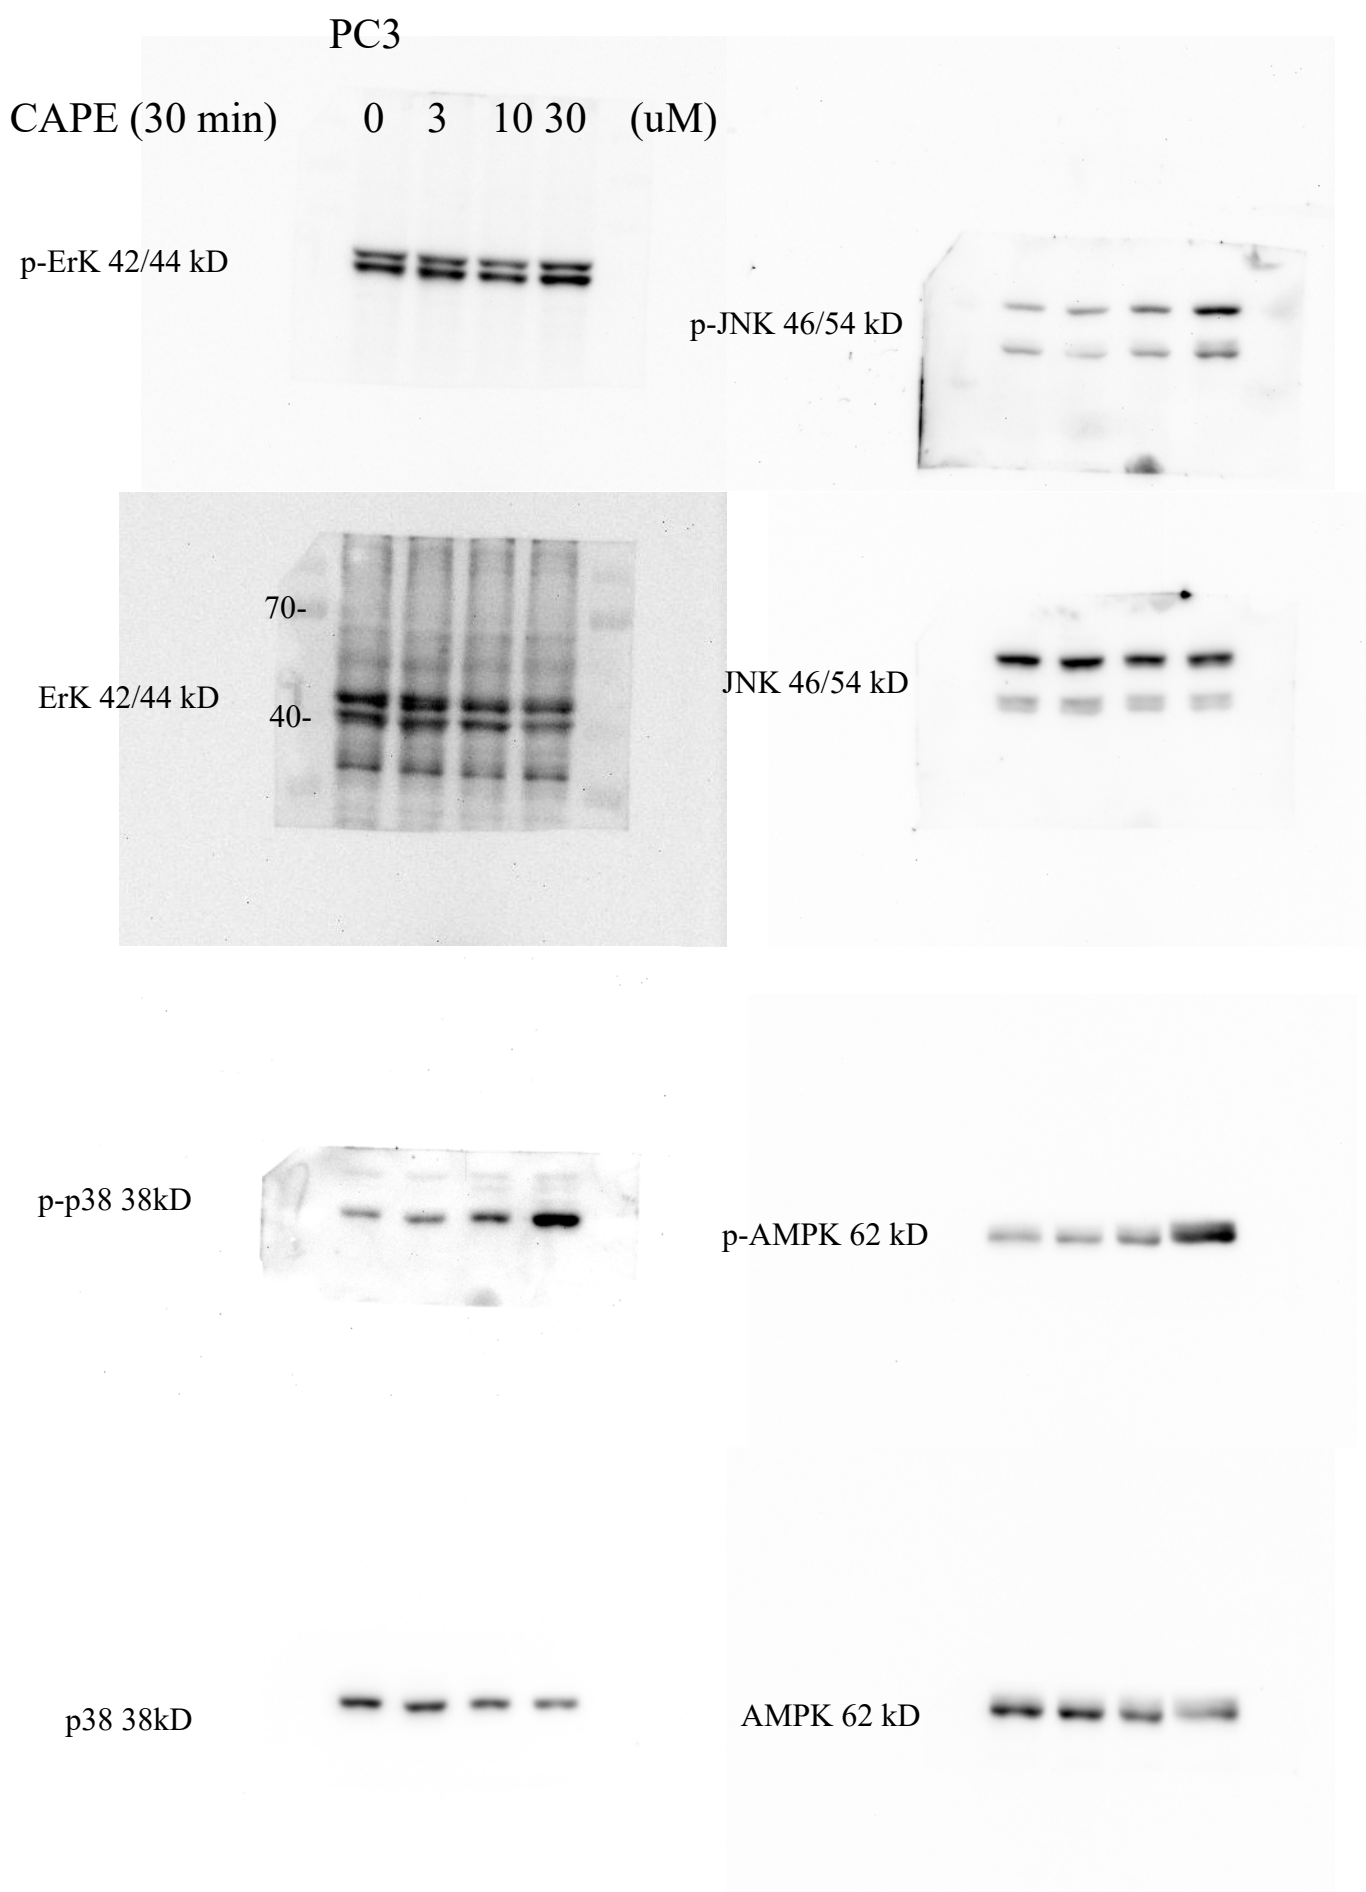

**Figure S4:** Original uncropped Western blots of figure 5
