# Supplementary material for: The Antitumor Effect of Caffeic Acid Phenethyl Ester by Downregulating Mucosa-Associated Lymphoid Tissue 1 via AR/p53/NF-κB Signaling in Prostate Carcinoma Cells
Source: MDPI journal article supplement (doi:10.3390/cancers14020274), 2022-01-06
Supplement: s1 [file s1]

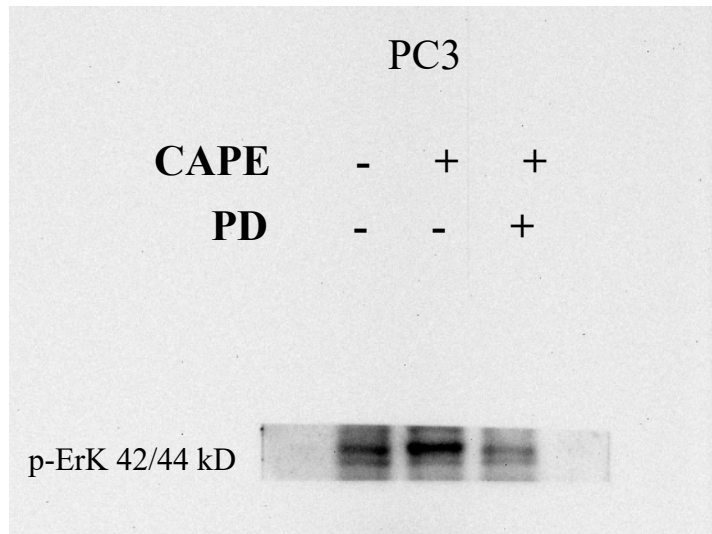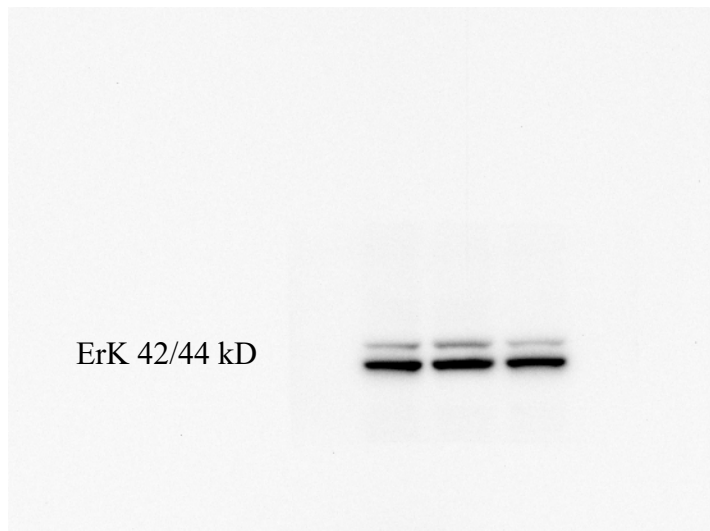

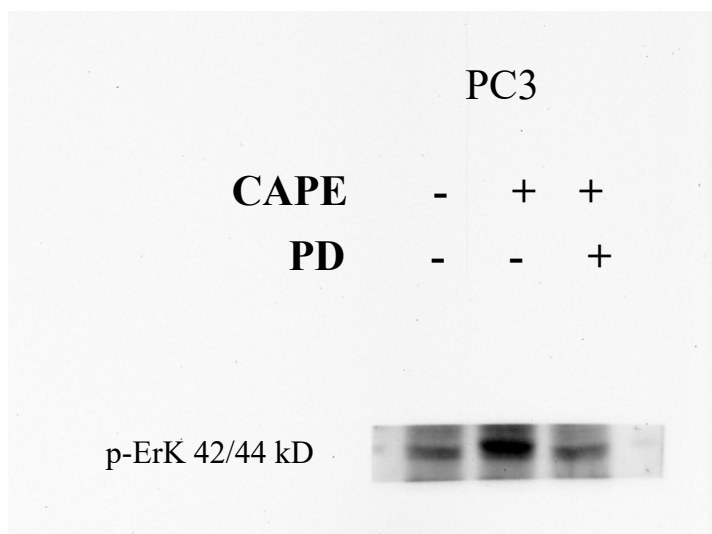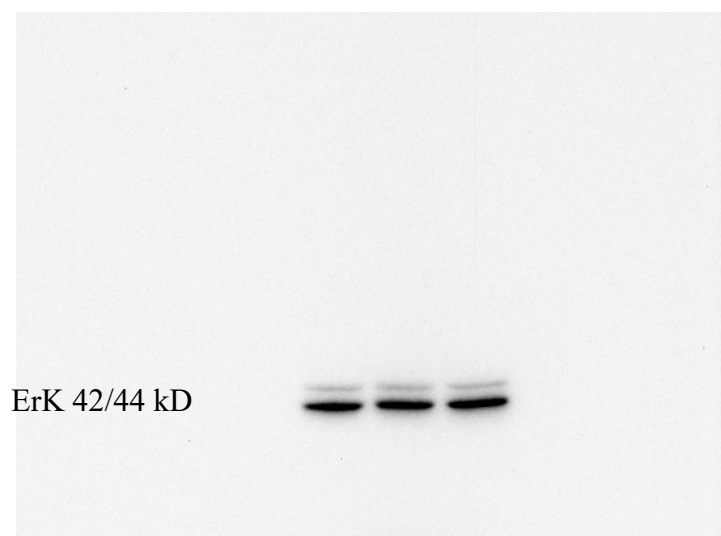

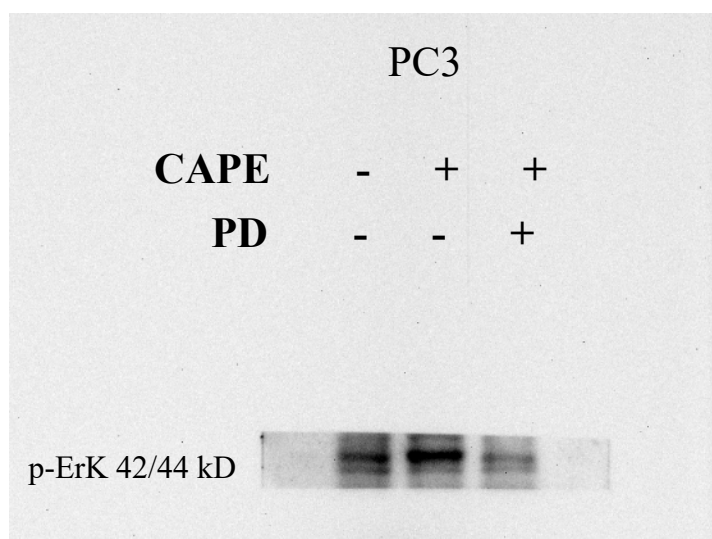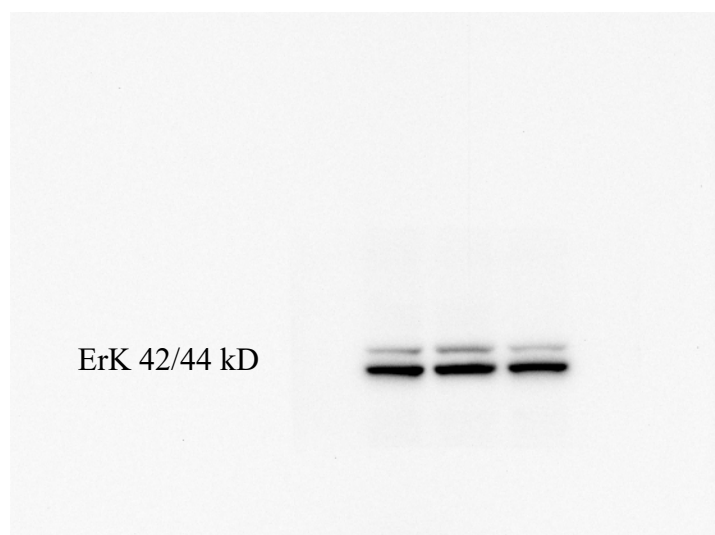

PC3

|      |   |   |   |
|------|---|---|---|
| CAPE | - | + | + |
| PD   | - | - | + |

MALT1 92kD

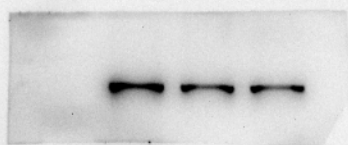

NDRG1 43kD

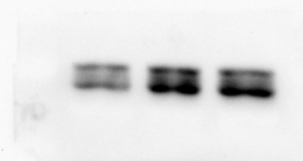

Actin 43kD

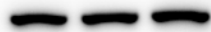

Maspin 42kD

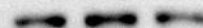

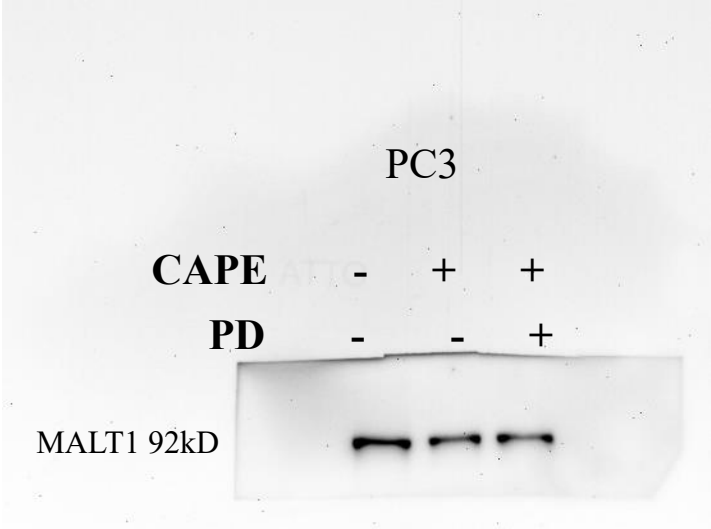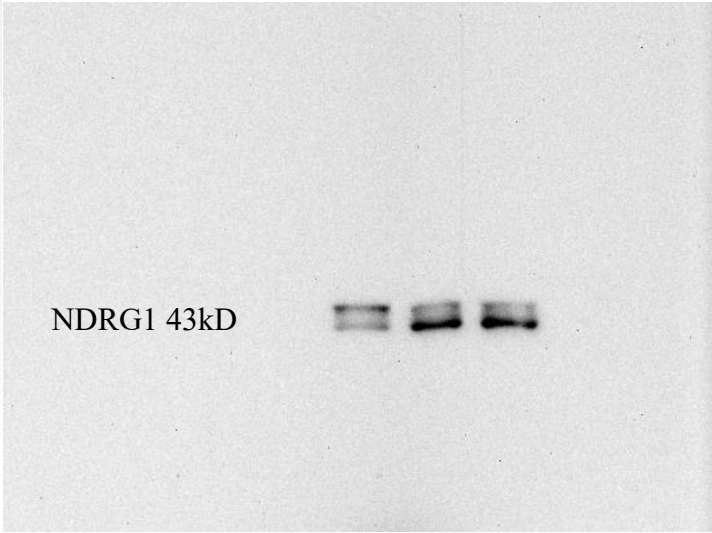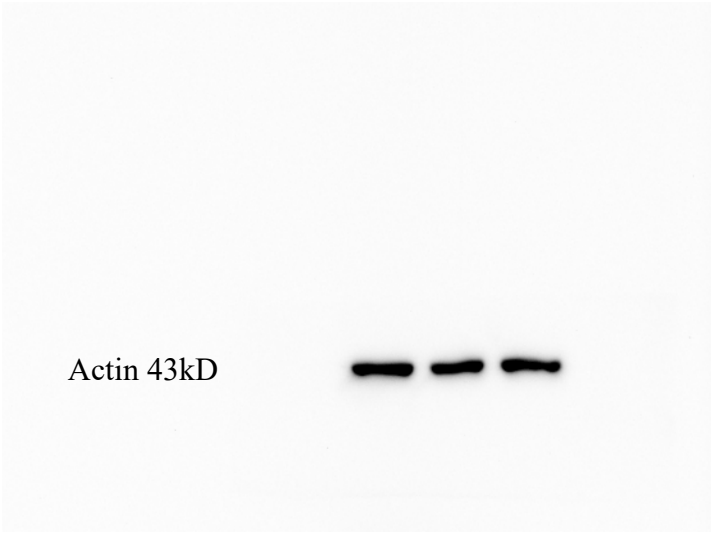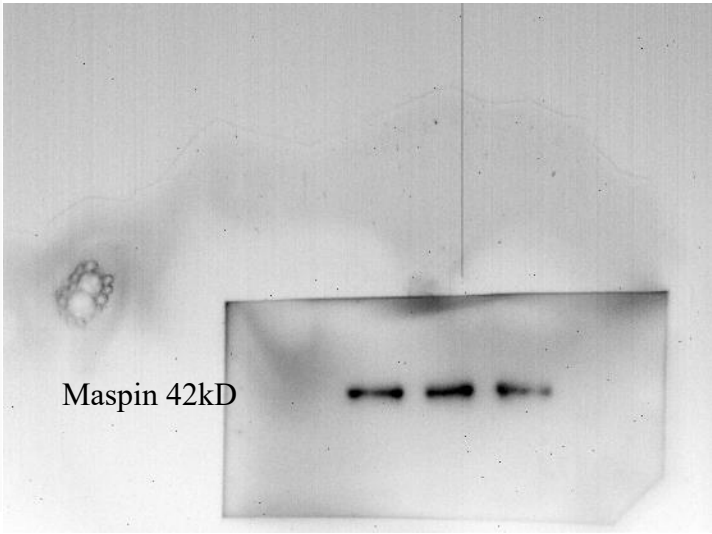

PC3

|      |   |   |   |
|------|---|---|---|
| CAPE | - | + | + |
| PD   | - | - | + |

MALT1 92kD

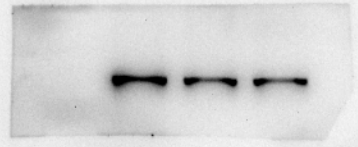

NDRG1 43kD

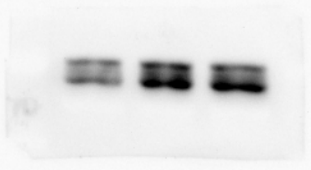

Actin 43kD

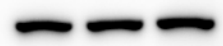

Maspin 42kD

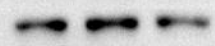

# PC3

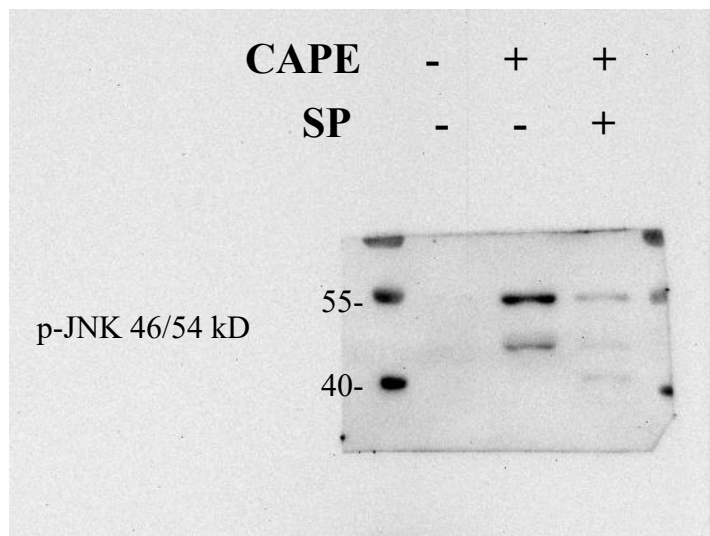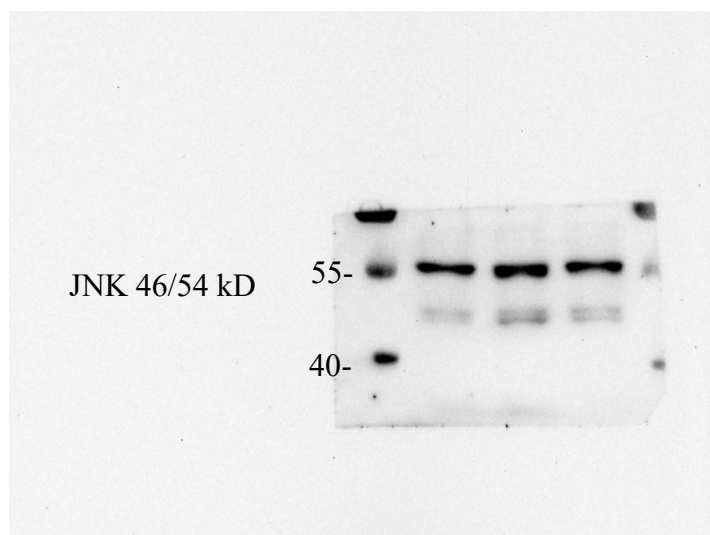

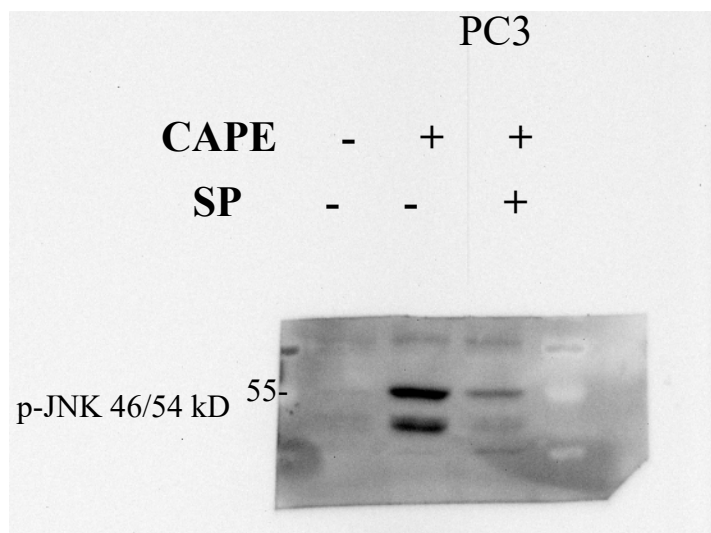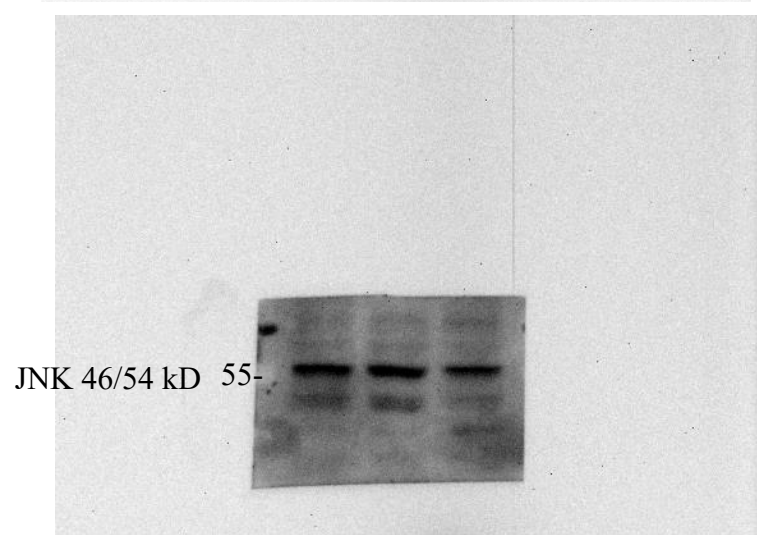



## PC3

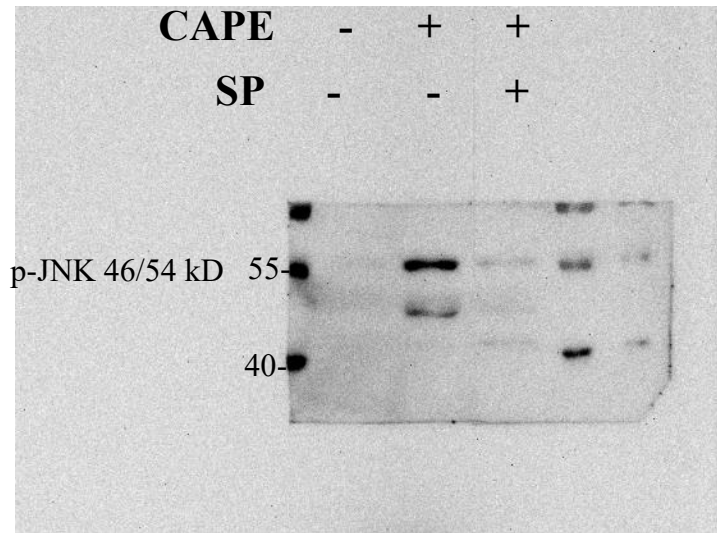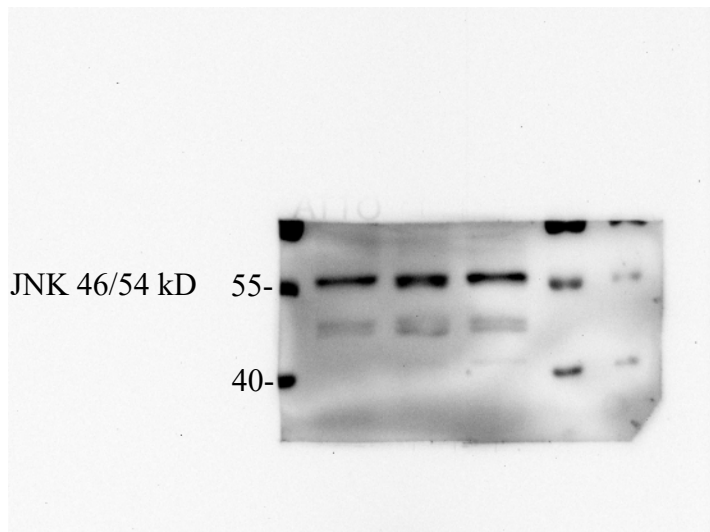

PC3

|      |   |   |   |
|------|---|---|---|
| CAPE | - | + | + |
| SP   | - | - | + |

MALT1 92kD

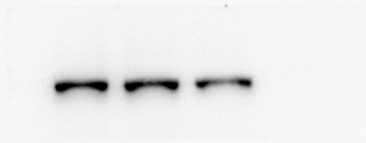

NDRG1 43kD

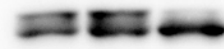

Actin 43kD

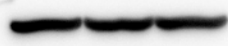

Maspin 42kD

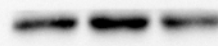

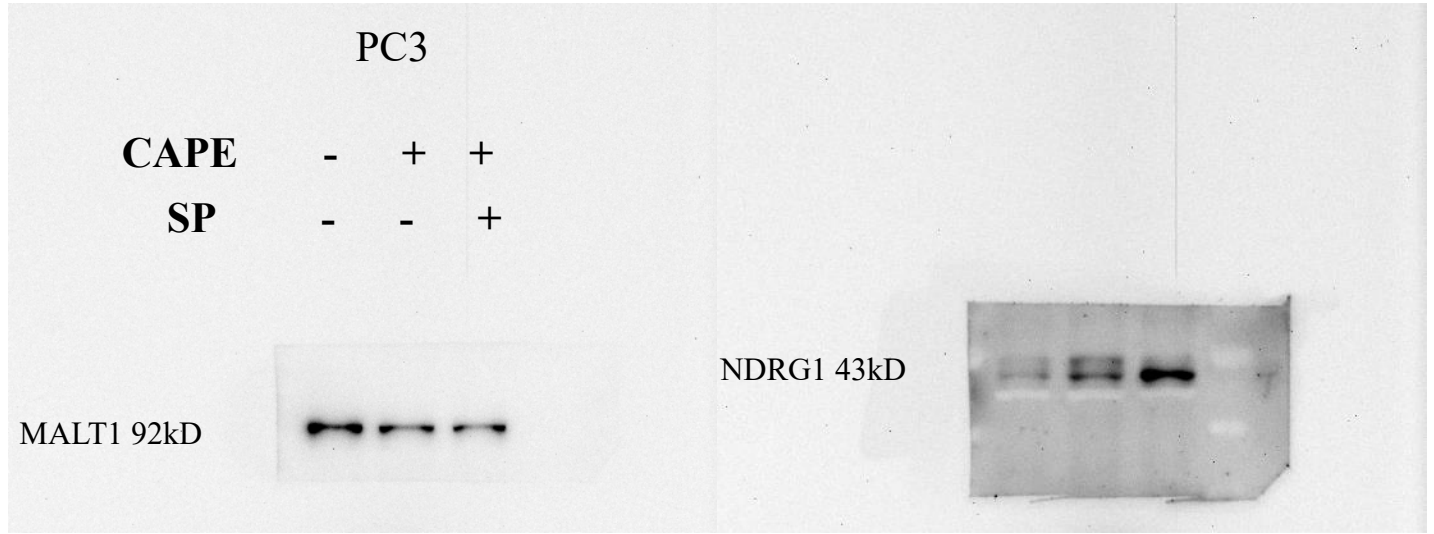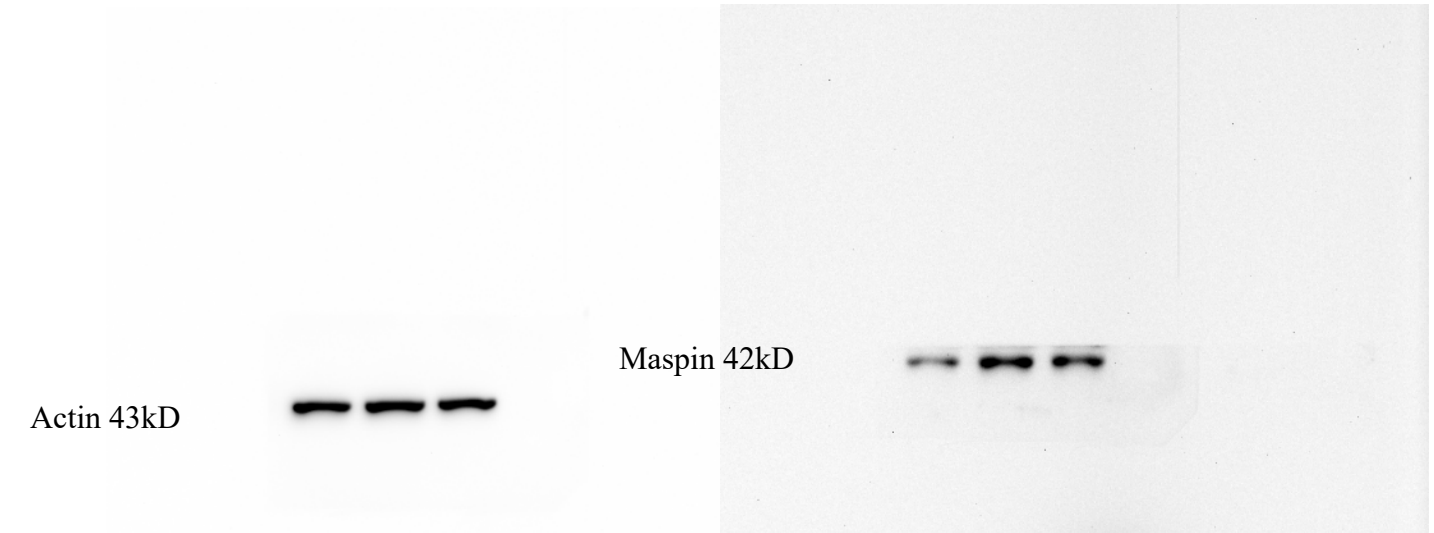

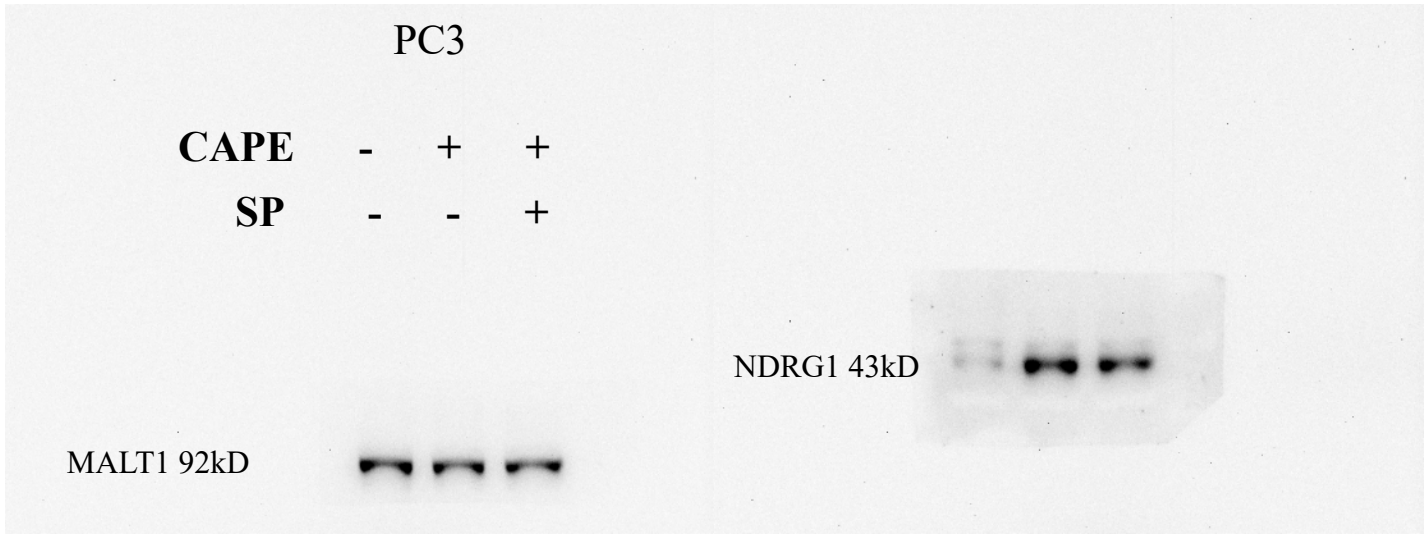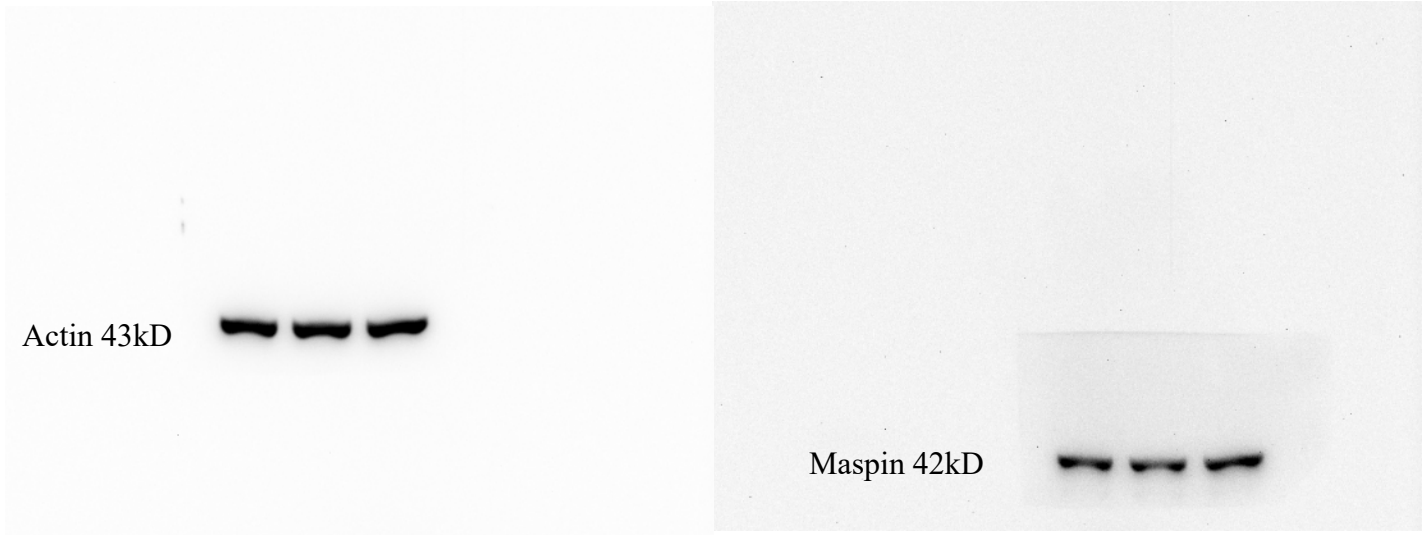

# PC3

**CAPE**

-

+

+

**SB**

-

-

+

p-p38 38kD

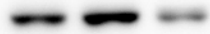

p38 38kD

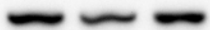

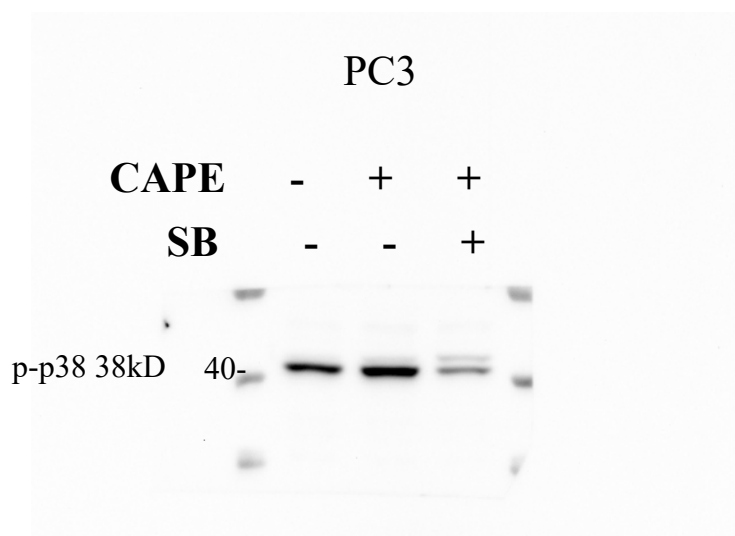

p38 38kD

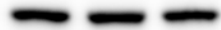

# PC3

| CAPE | - | + | + |
|------|---|---|---|
| SB   | - | - | + |

p-p38 38kD 40-

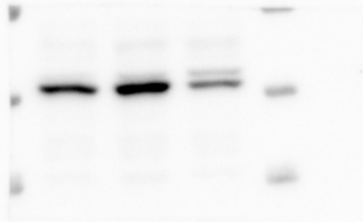

p38 38kD

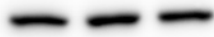

PC3

CAPE

-

+

+

SB

-

-

+

MALT1 92kD

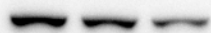

NDRG1 43kD

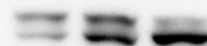

Actin 43kD

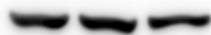

Maspin 42kD

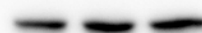



PC3

|      |   |   |   |
|------|---|---|---|
| CAPE | - | + | + |
| SB   | - | - | + |

MALT1 92kD

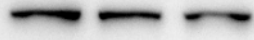

NDRG1 43kD

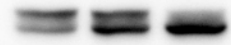

Actin 43kD

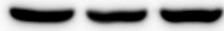

Maspin 42kD

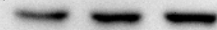

PC3

CAPE

- + +

SB

- - +

MALT1 92kD

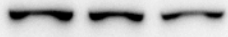

NDRG1 43kD

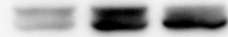

Actin 43kD

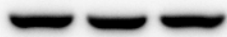

Maspin 42kD

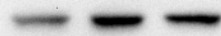

PC3

|             |   |   |   |
|-------------|---|---|---|
| <b>CAPE</b> | - | + | + |
| <b>Dor</b>  | - | - | + |

p-AMPK 62 kD

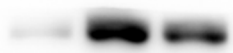

AMPK 62 kD

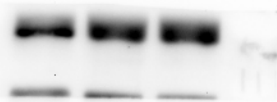

PC3

|             |   |   |   |
|-------------|---|---|---|
| <b>CAPE</b> | - | + | + |
| <b>Dor</b>  | - | - | + |

p-AMPK 62 kD

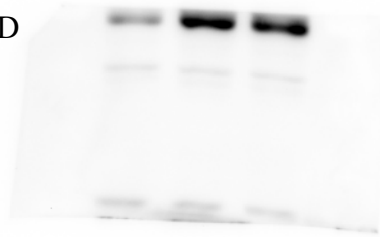

AMPK 62 kD

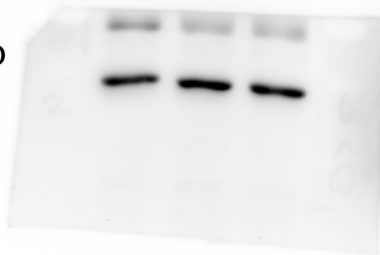

PC3

|             |   |   |   |
|-------------|---|---|---|
| <b>CAPE</b> | - | + | + |
| <b>Dor</b>  | - | - | + |

p-AMPK 62 kD

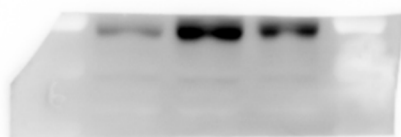

AMPK 62 kD

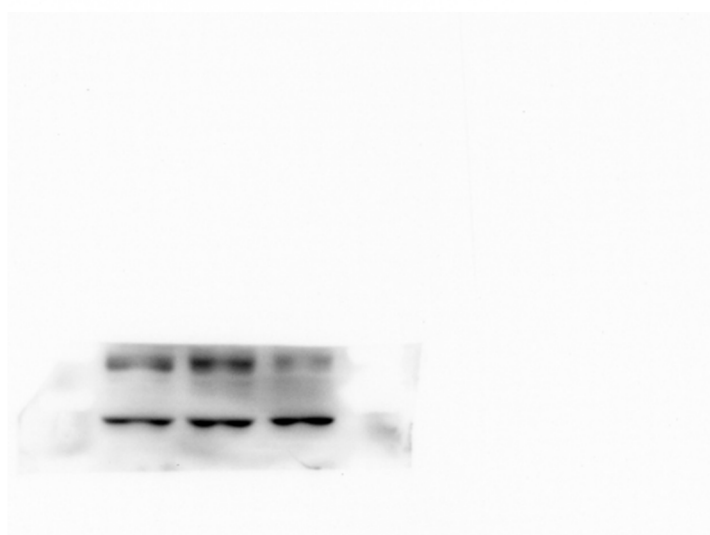

PC3

|      |   |   |   |
|------|---|---|---|
| CAPE | - | + | + |
| Dor  | - | - | + |

MALT1 92kD

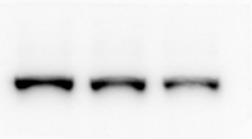

NDRG1 43kD

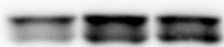

Actin 43kD

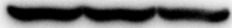

Maspin 42kD

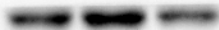

PC3

CAPE

- + +

Dor

- - +

MALT1 92kD

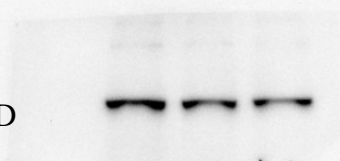

NDRG1 43kD

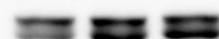

Actin 43kD

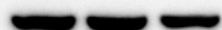

Maspin 42kD

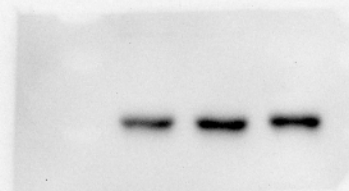

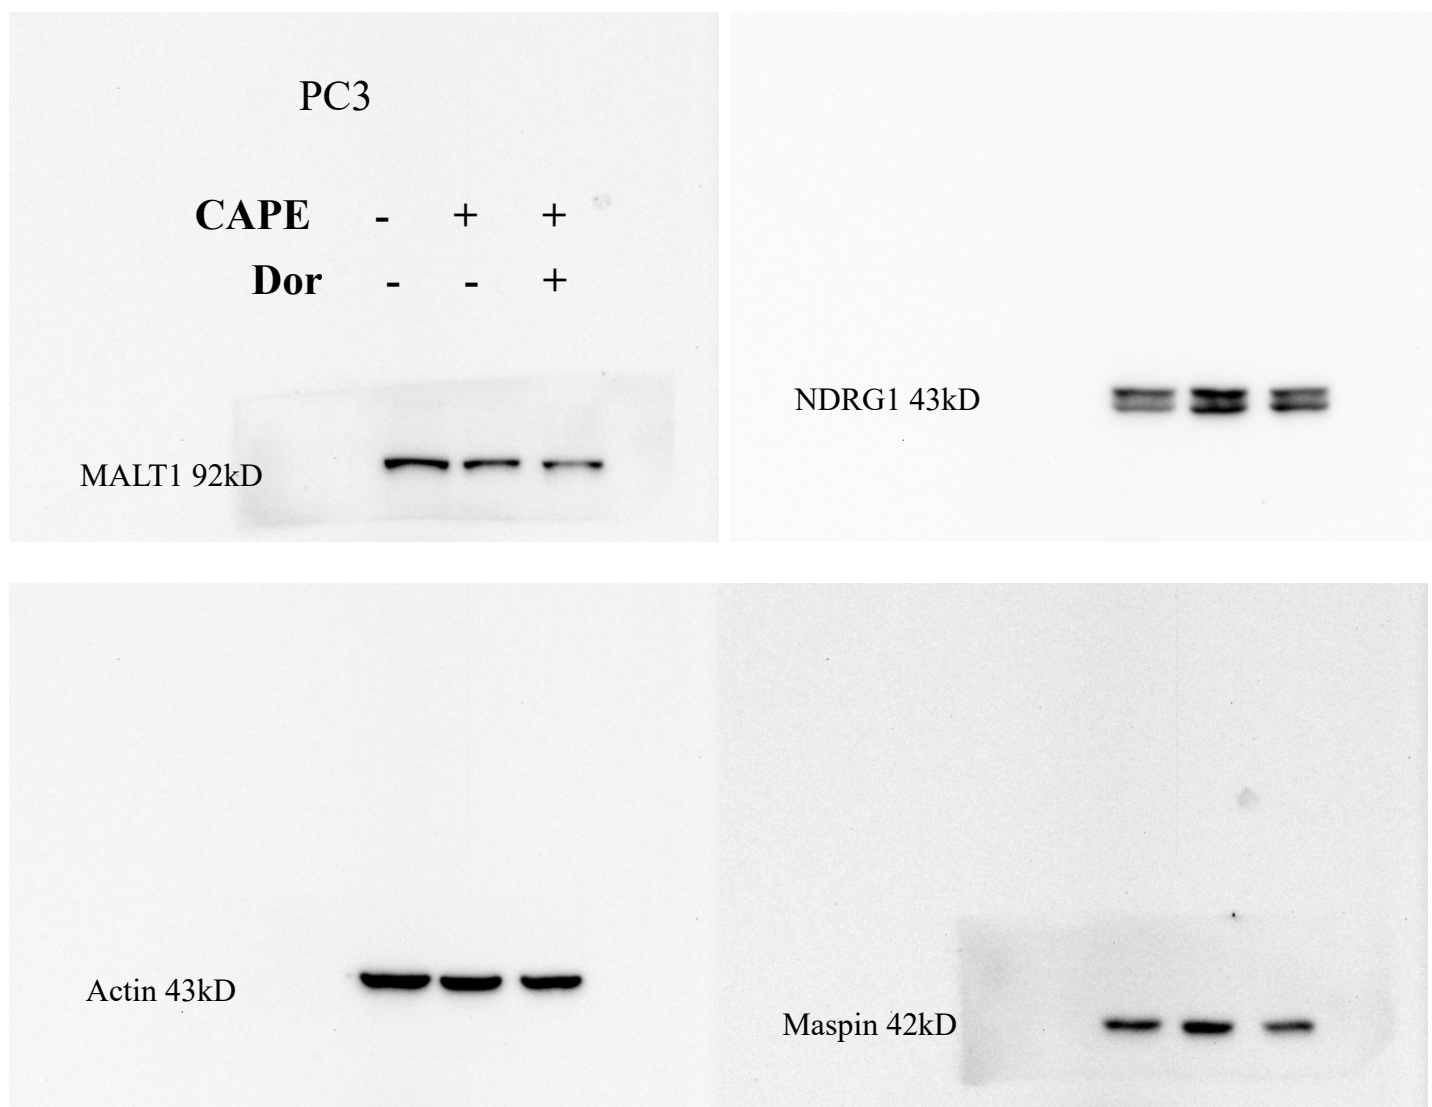

**Figure S5:** Original uncropped Western blots of figure 6
