# Supplementary material for: The Antitumor Effect of Caffeic Acid Phenethyl Ester by Downregulating Mucosa-Associated Lymphoid Tissue 1 via AR/p53/NF-κB Signaling in Prostate Carcinoma Cells
Source: MDPI journal article supplement (doi:10.3390/cancers14020274), 2022-01-06
Supplement: s1 [file s1]

LNCaP

CAPE

0 3 10 30 (uM)

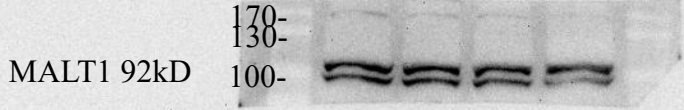

p53 53kD

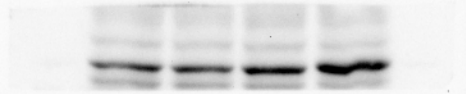

PSA 34kD

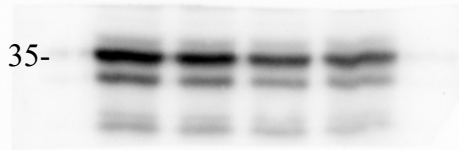

NDRG1 43kD

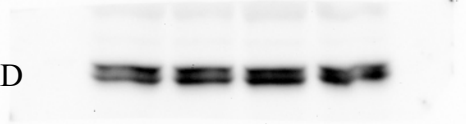

AR 110kD

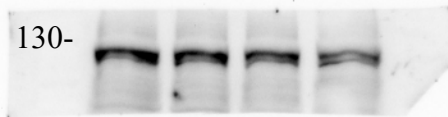

Actin 43kD

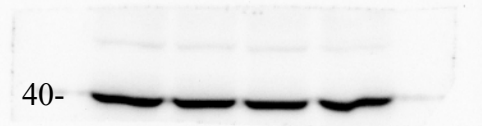

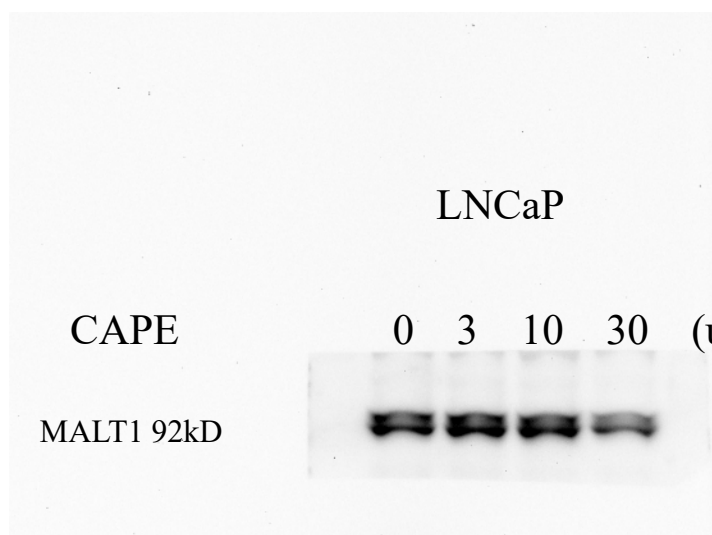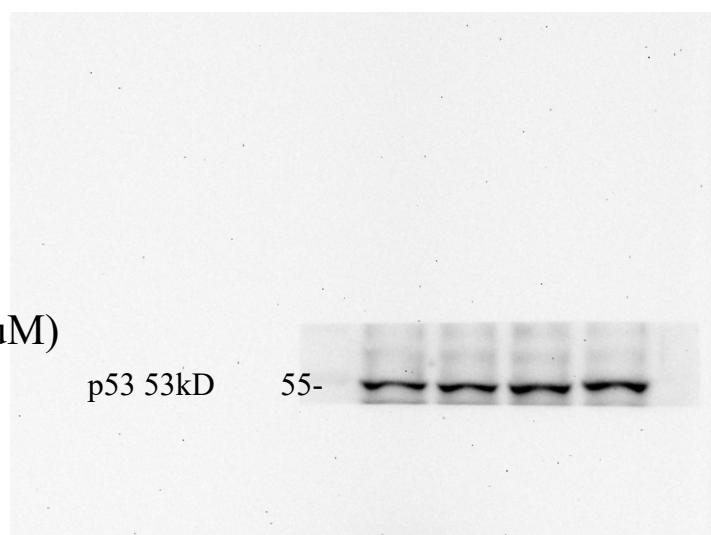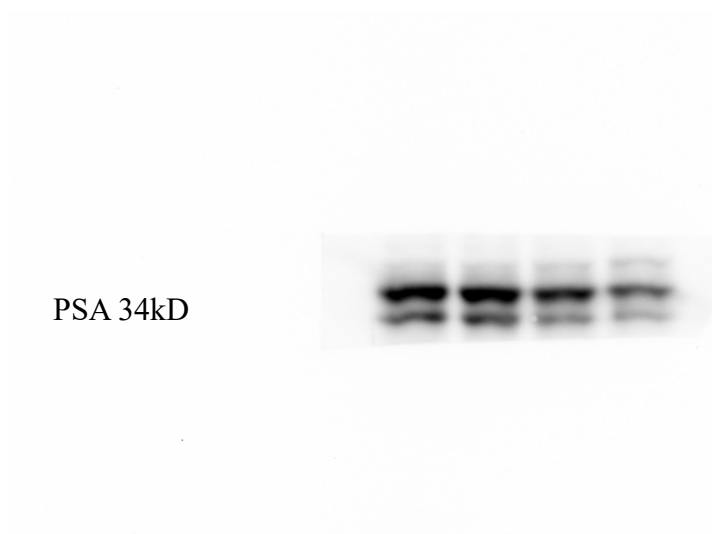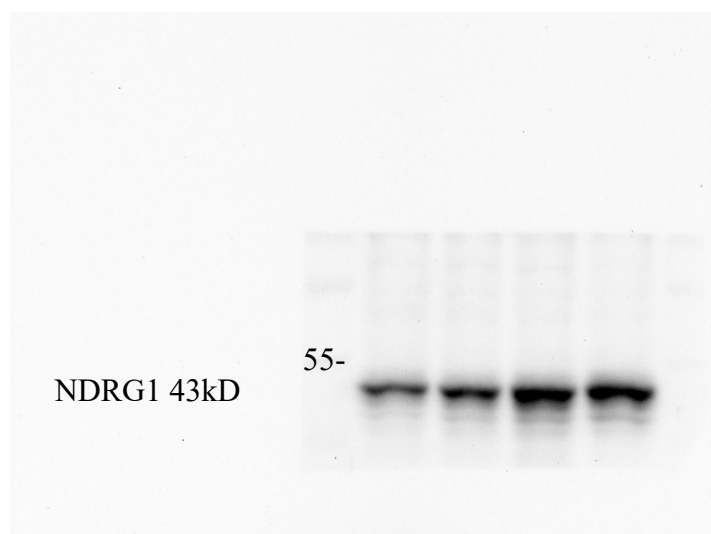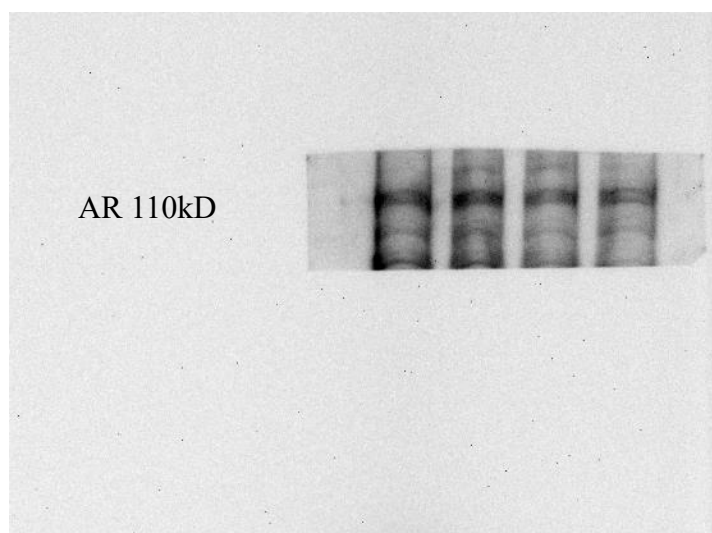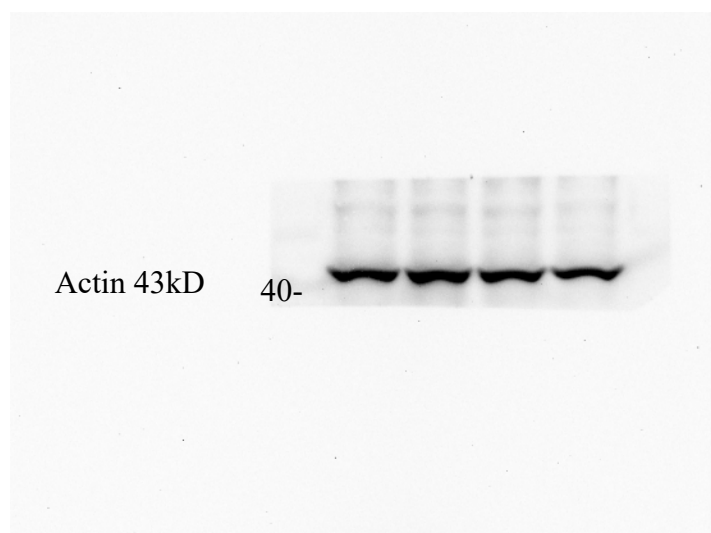

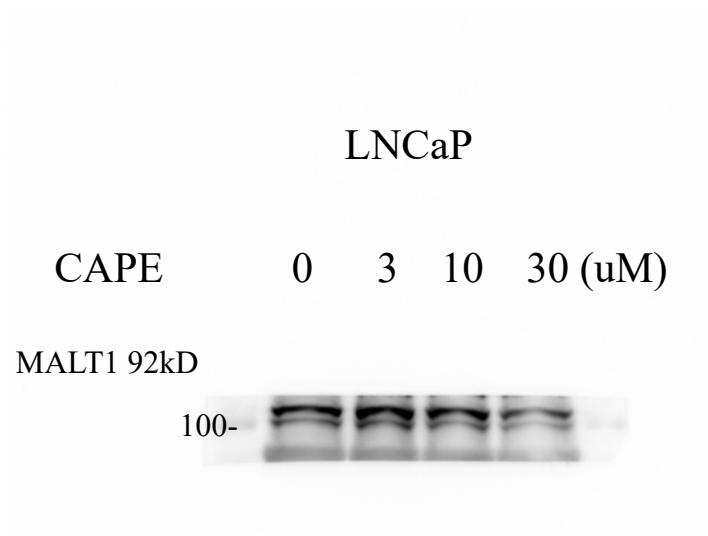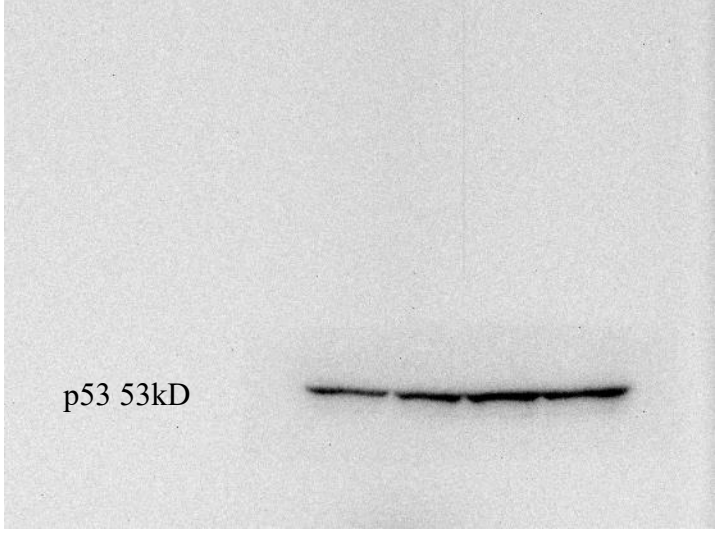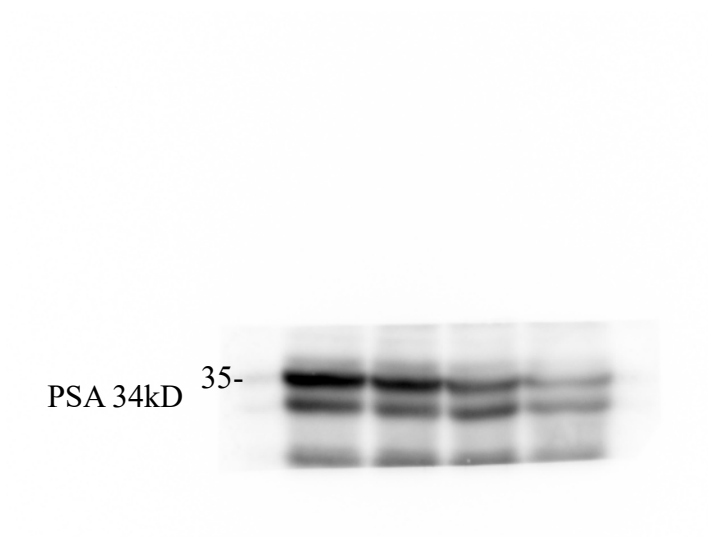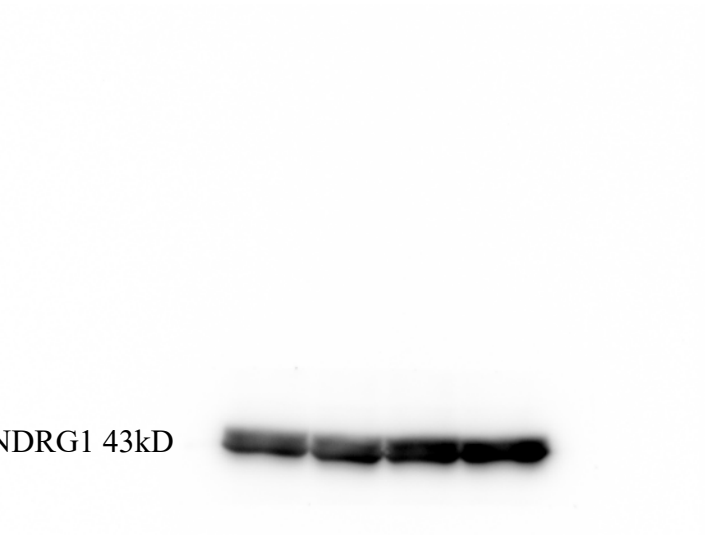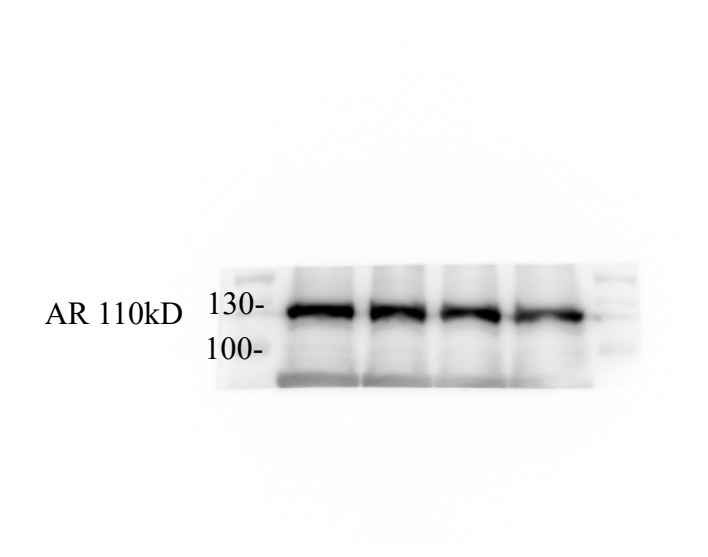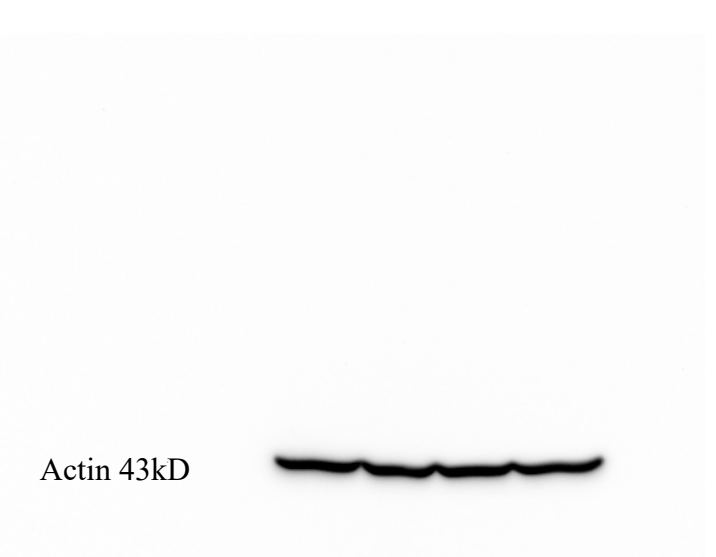

# LNCaP

|       |   |   |   |         |
|-------|---|---|---|---------|
| CAPE  | - | - | + | +       |
| R1881 | - | + | - | +       |
|       |   |   |   | (30 uM) |
|       |   |   |   | (10 nM) |

MALT1 92kD

100-

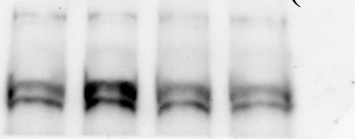

p53 53kD

55-

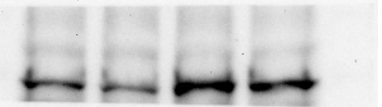

PSA 34kD

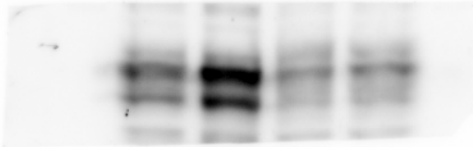

Actin 43kD

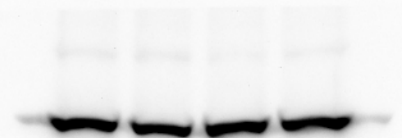

AR 110kD

130-

100-

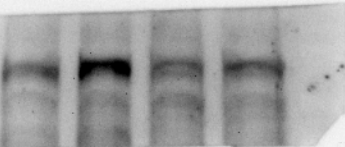

# LNCaP

| CAPE  | - | - | + | +       |
|-------|---|---|---|---------|
| R1881 | - | + | - | +       |
|       |   |   |   | (30 uM) |
|       |   |   |   | (10 nM) |

MALT1 92kD

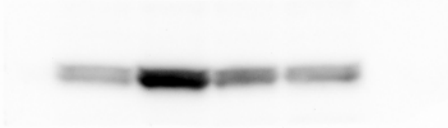

p53 53kD

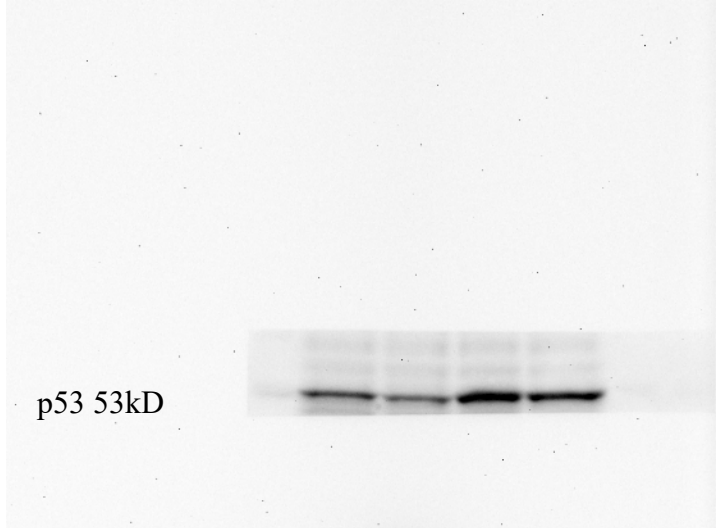

PSA 34kD

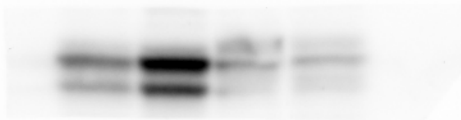

Actin 43kD

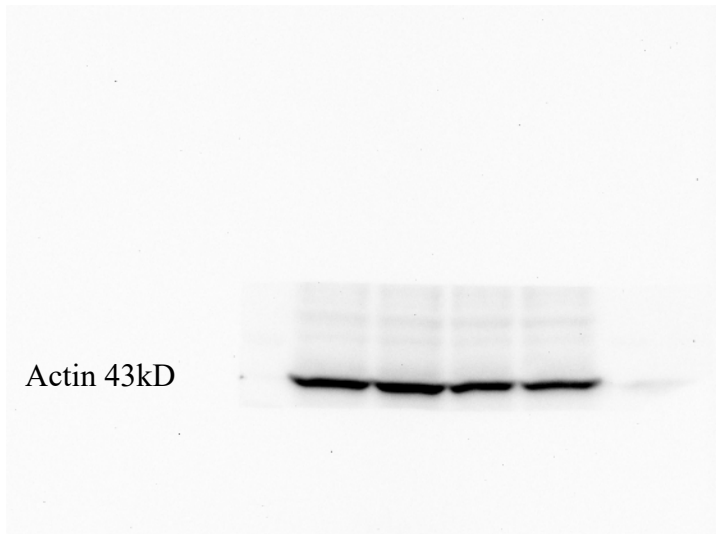

AR 110kD

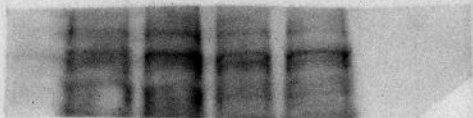

# LNCaP

|       |   |   |   |   |         |
|-------|---|---|---|---|---------|
| CAPE  | - | - | + | + | (30 uM) |
| R1881 | - | + | - | + | (10 nM) |

MALT1 92kD

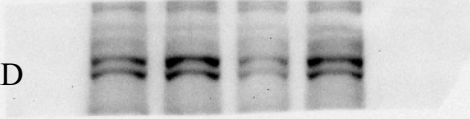

p53 53kD

55-

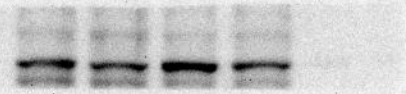

PSA 34kD

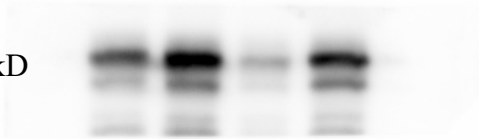

Actin 43kD

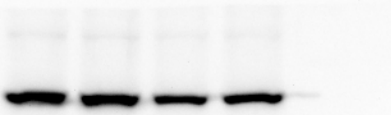

AR 110kD

130-  
100-

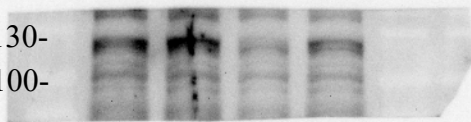

22RV1

|       |   |   |   |   |         |
|-------|---|---|---|---|---------|
| CAPE  | - | - | + | + | (30 uM) |
| R1881 | - | + | - | + | (10 nM) |

MALT1 92kD

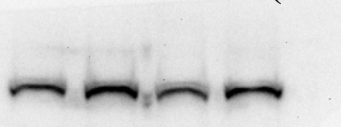

p53 53kD

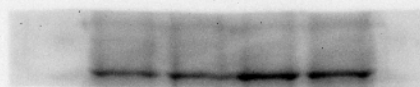

PSA 34kD

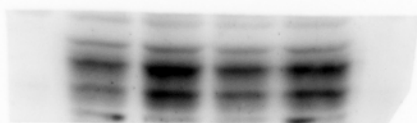

Actin 43kD

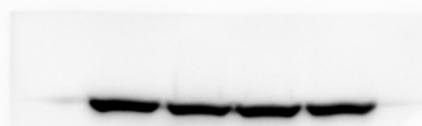

AR 110kD

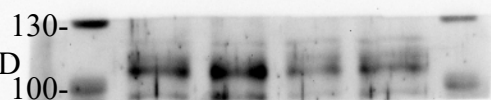



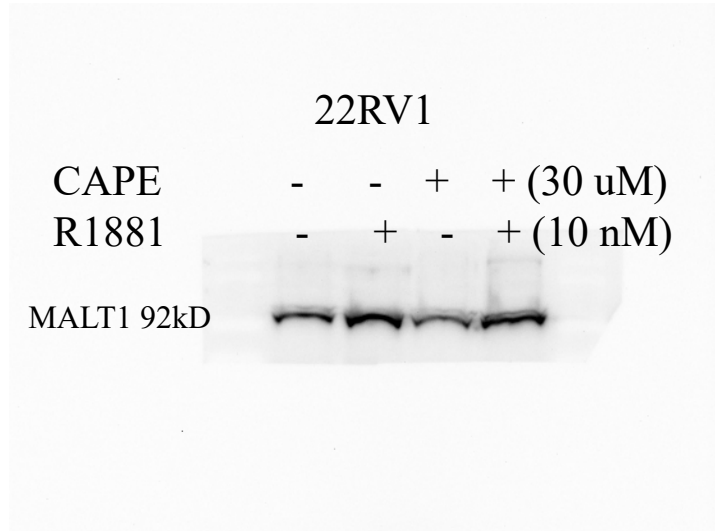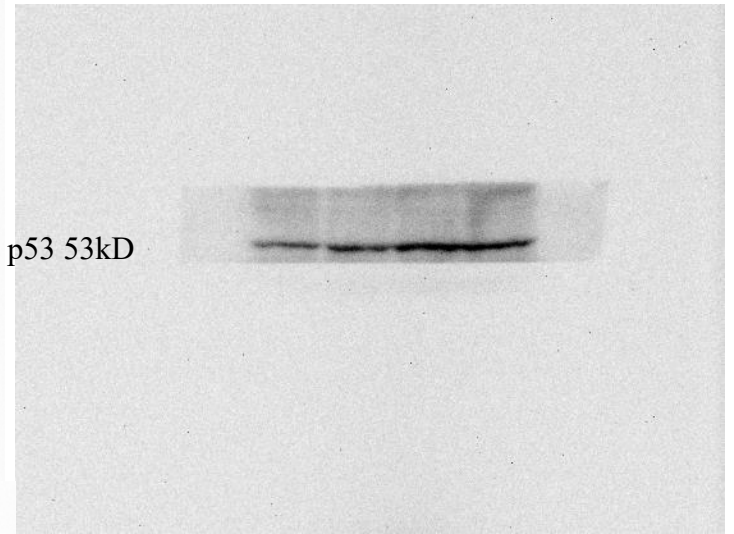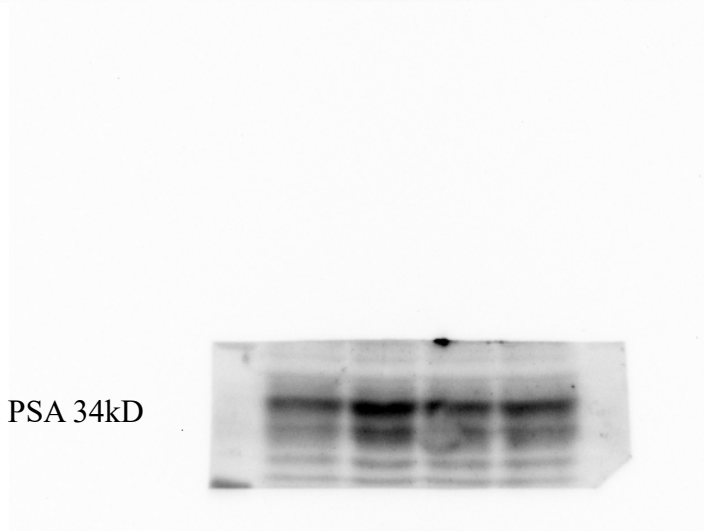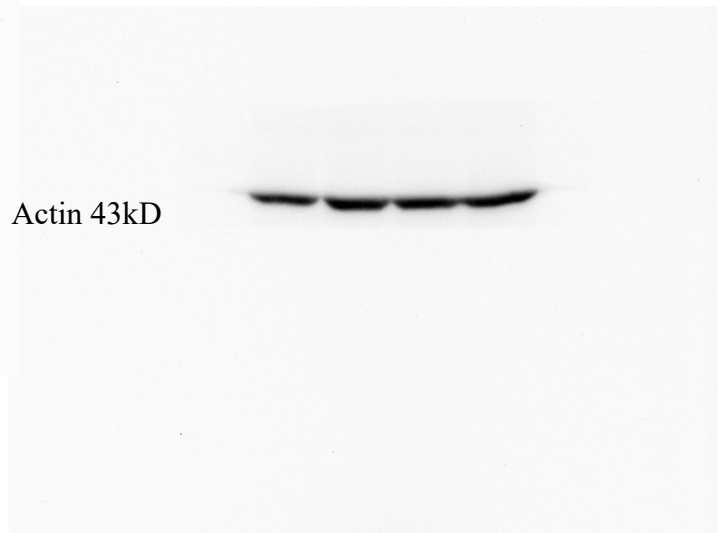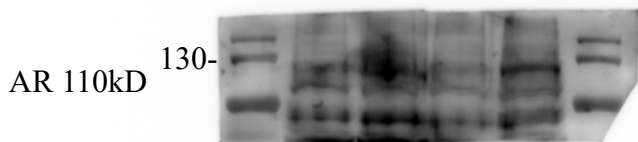



|       |       |   |   |         |
|-------|-------|---|---|---------|
|       | 22RV1 |   |   |         |
| CAPE  | -     | - | + | +       |
|       |       |   |   | (30 uM) |
| R1881 | -     | + | - | +       |
|       |       |   |   | (10 nM) |

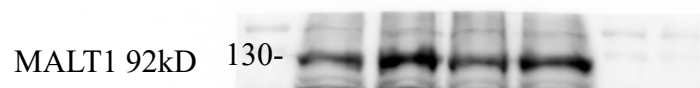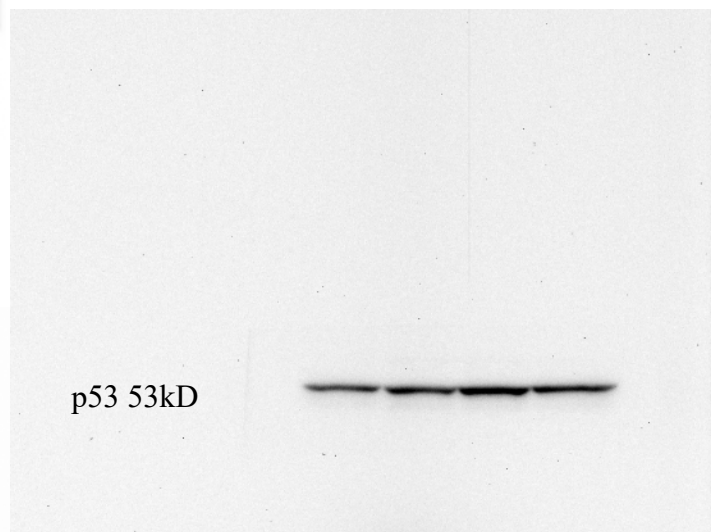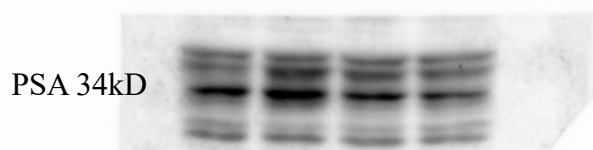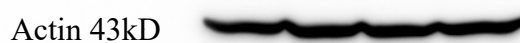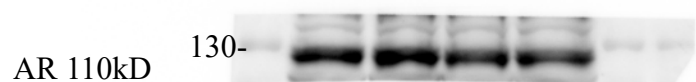

**Figure S1:** Original uncropped Western blots of figure 1
