# Supplementary figures and images for: The Antitumor Effect of Caffeic Acid Phenethyl Ester by Downregulating Mucosa-Associated Lymphoid Tissue 1 via AR/p53/NF-κB Signaling in Prostate Carcinoma Cells
Source: MDPI journal article supplement (doi:10.3390/cancers14020274), 2022-01-06

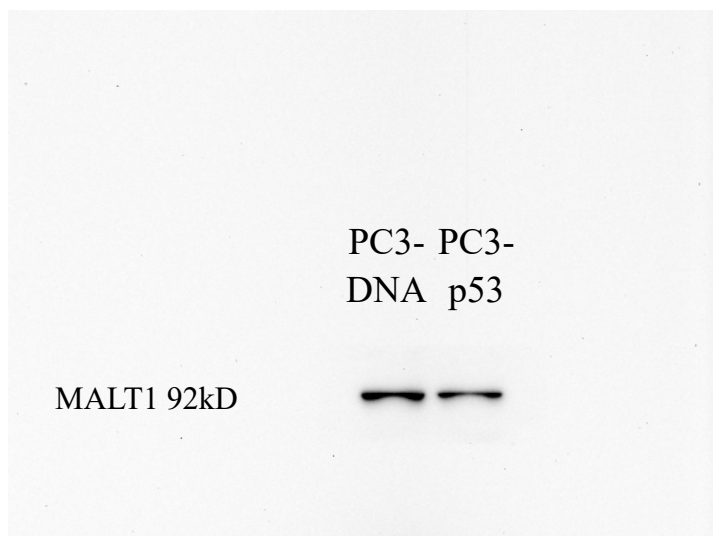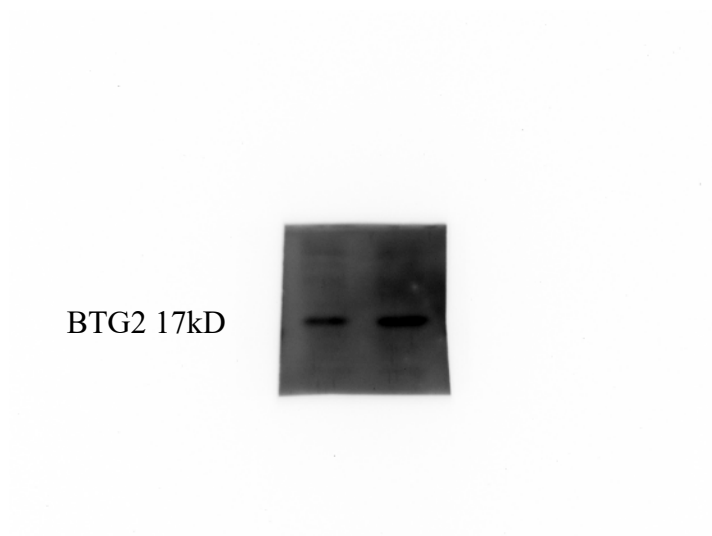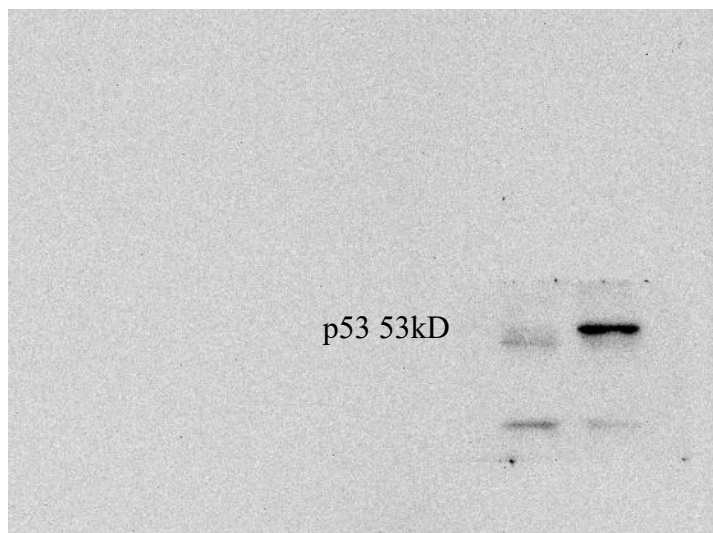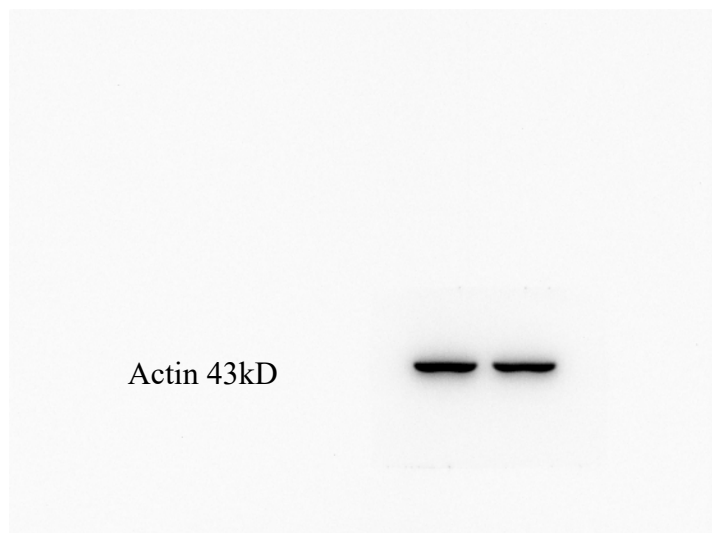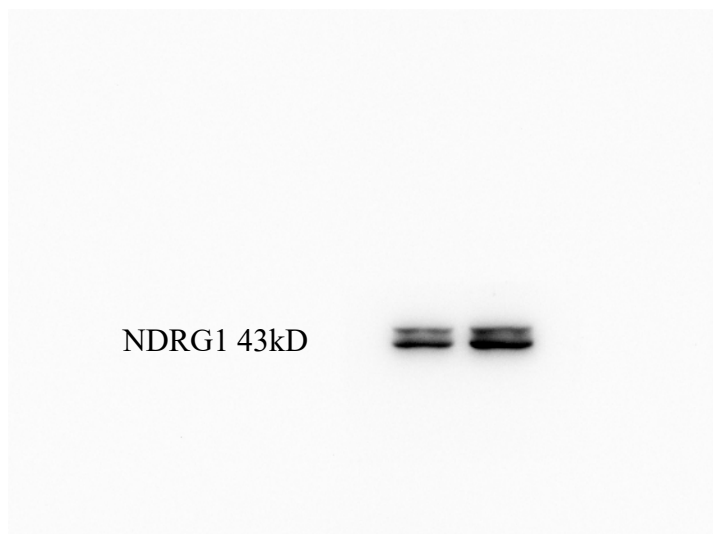

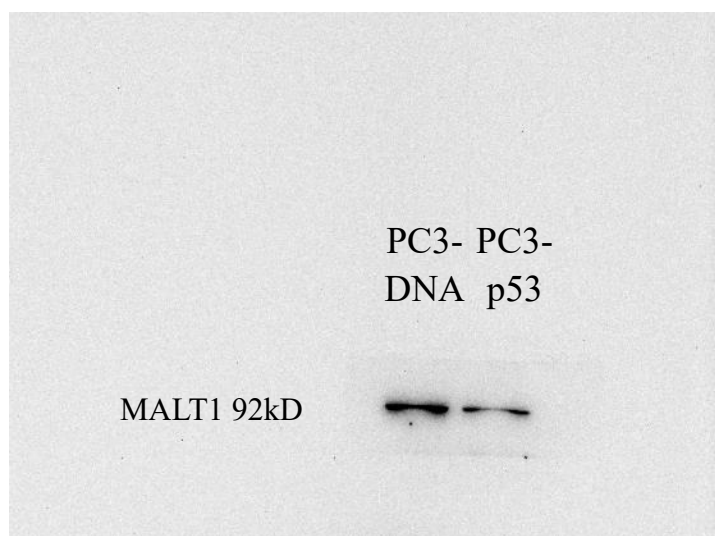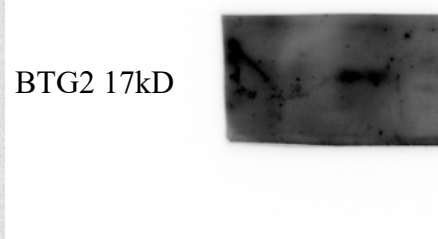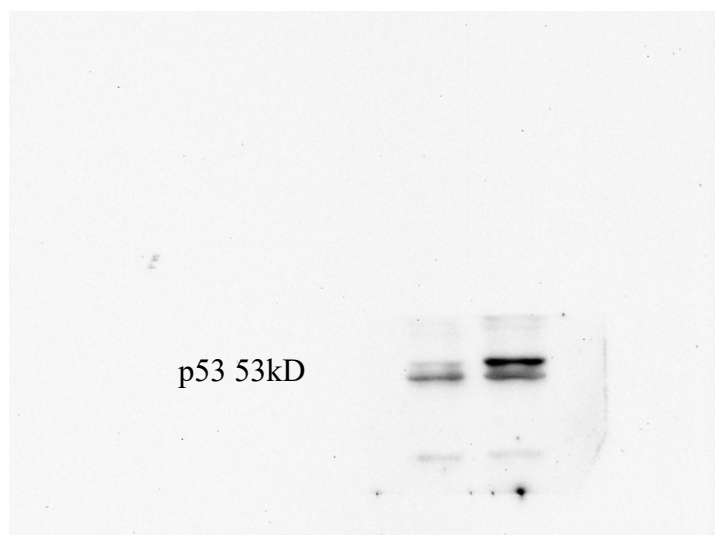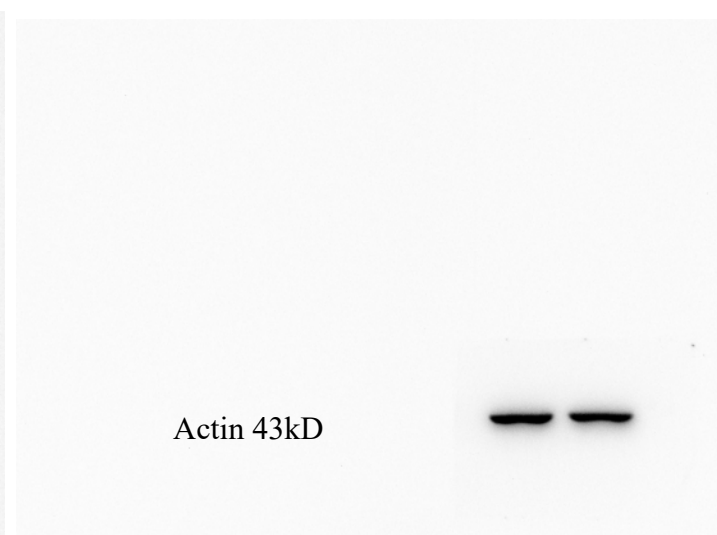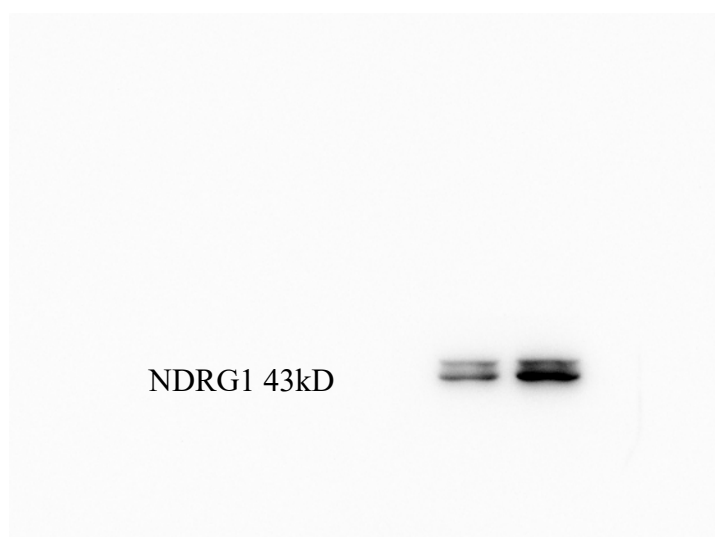

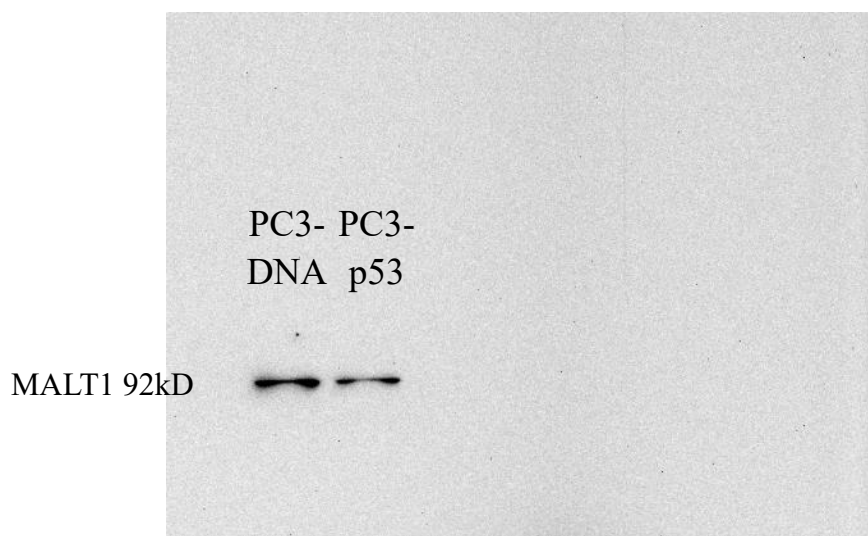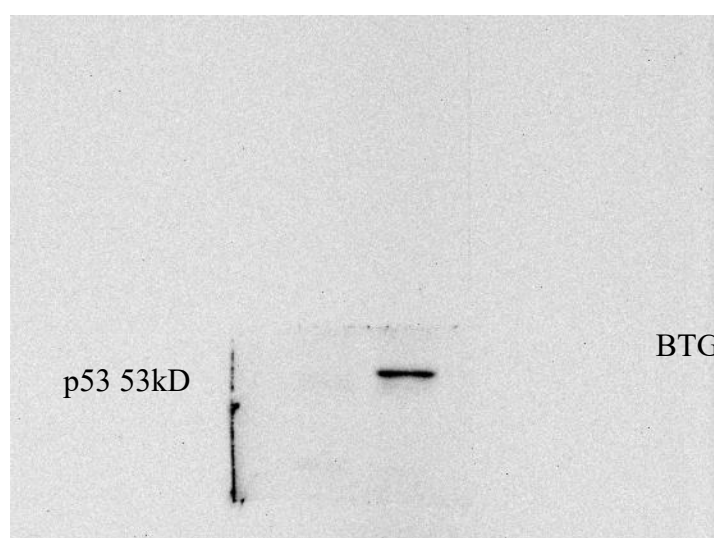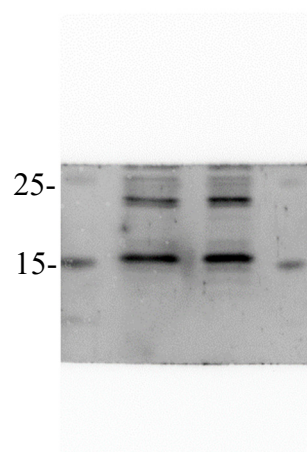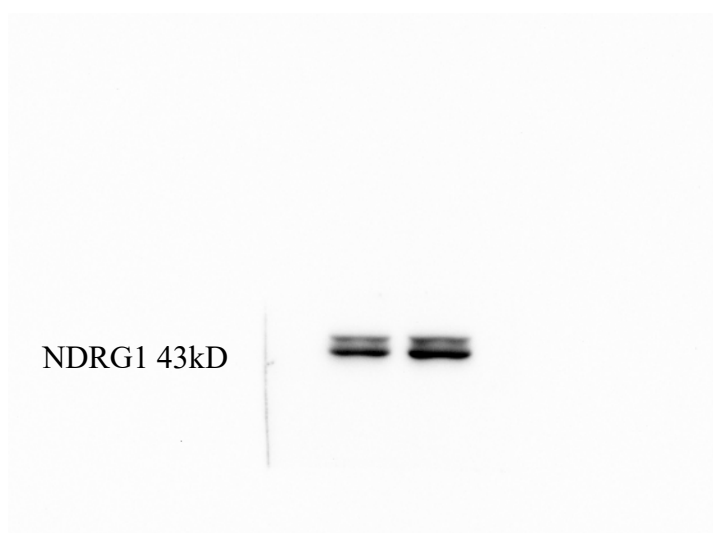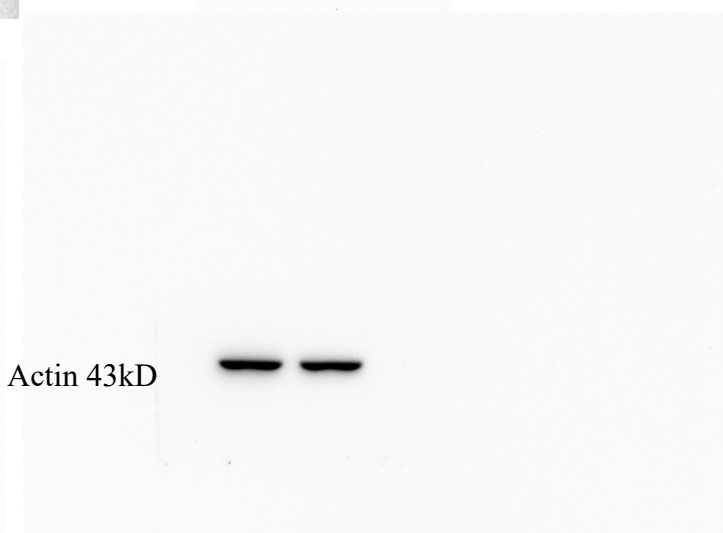

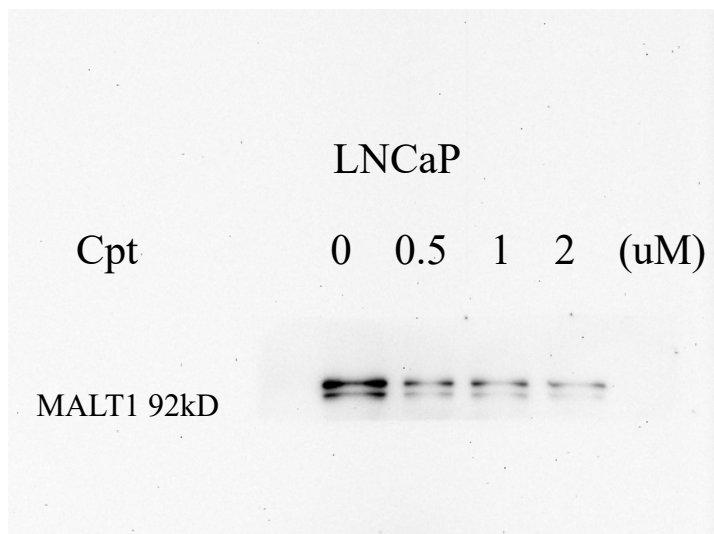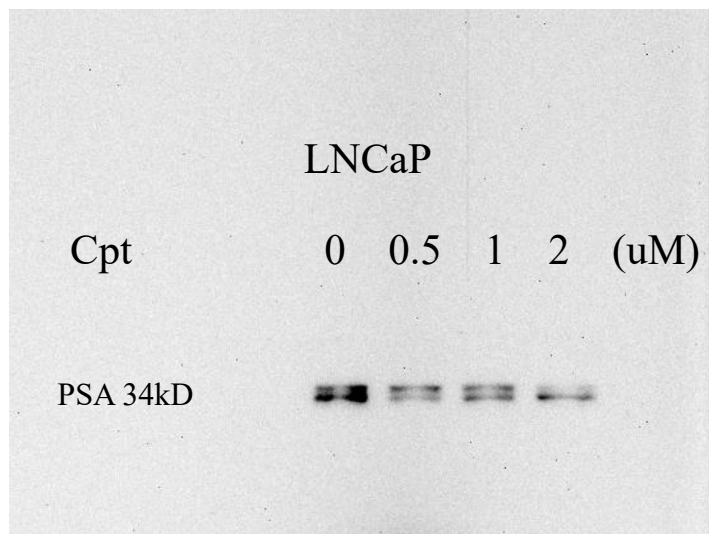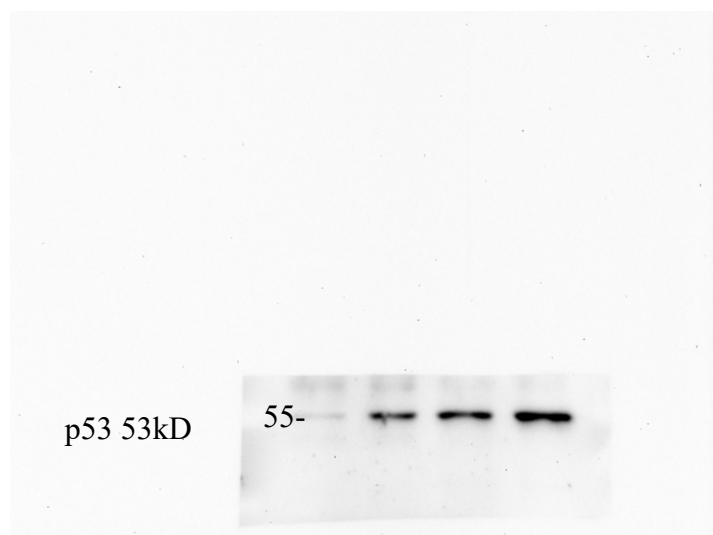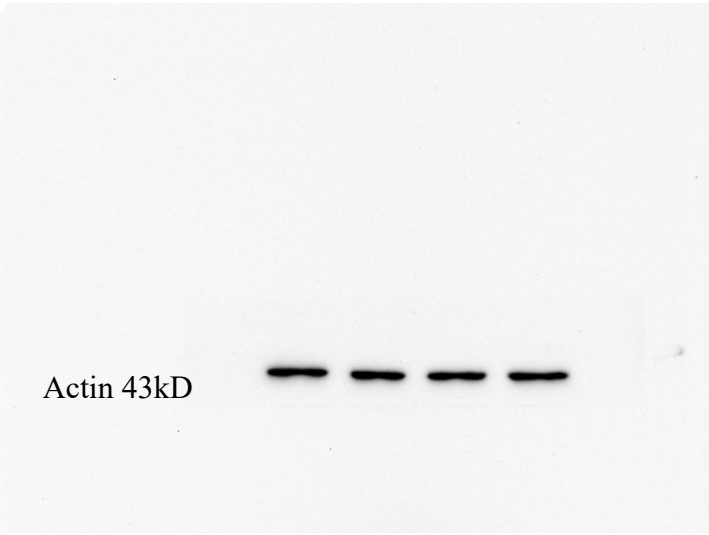

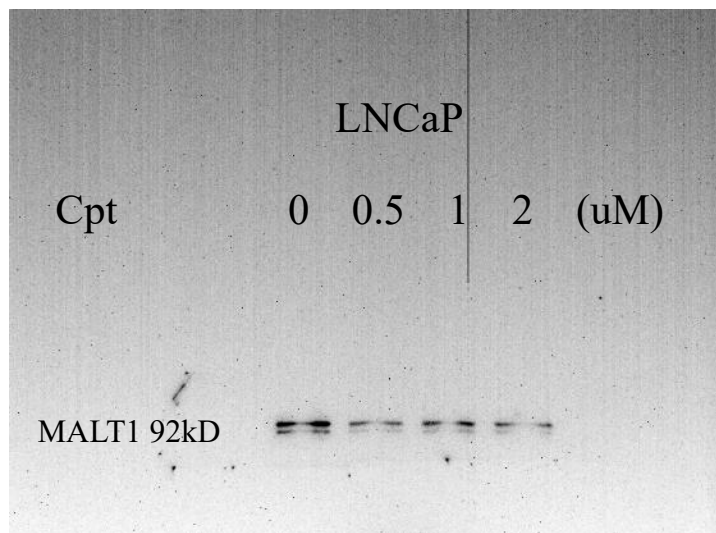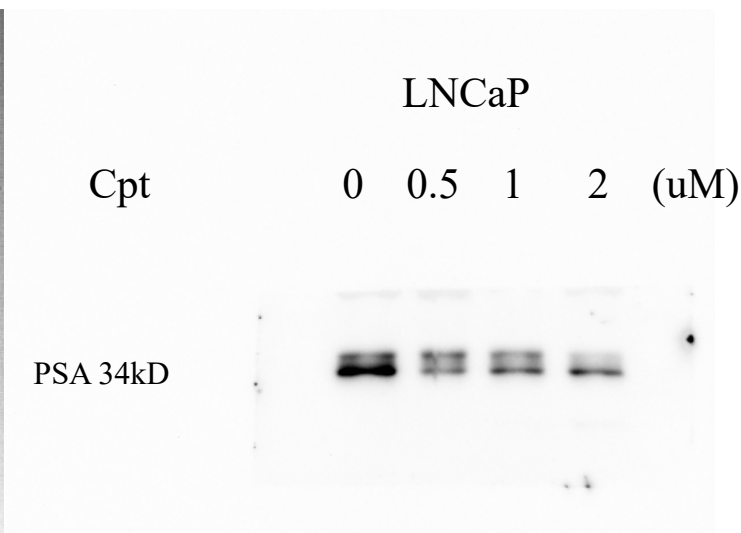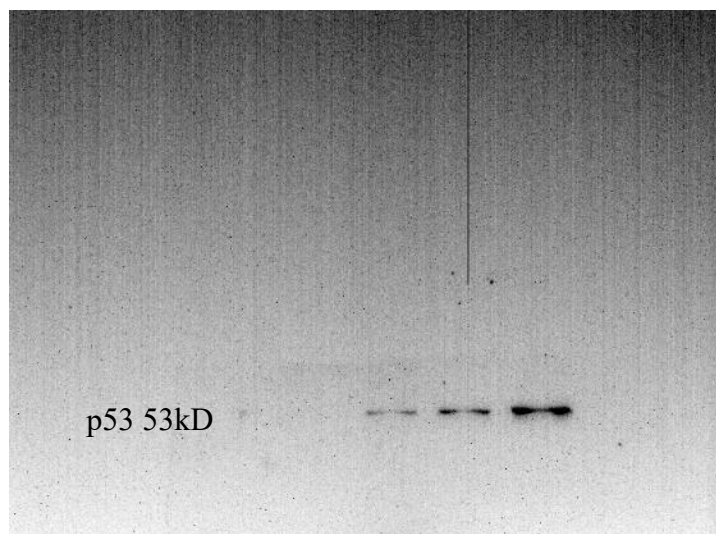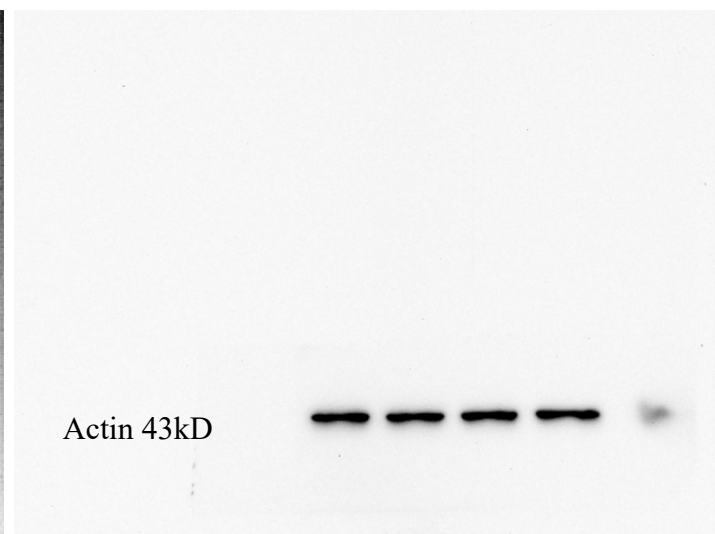

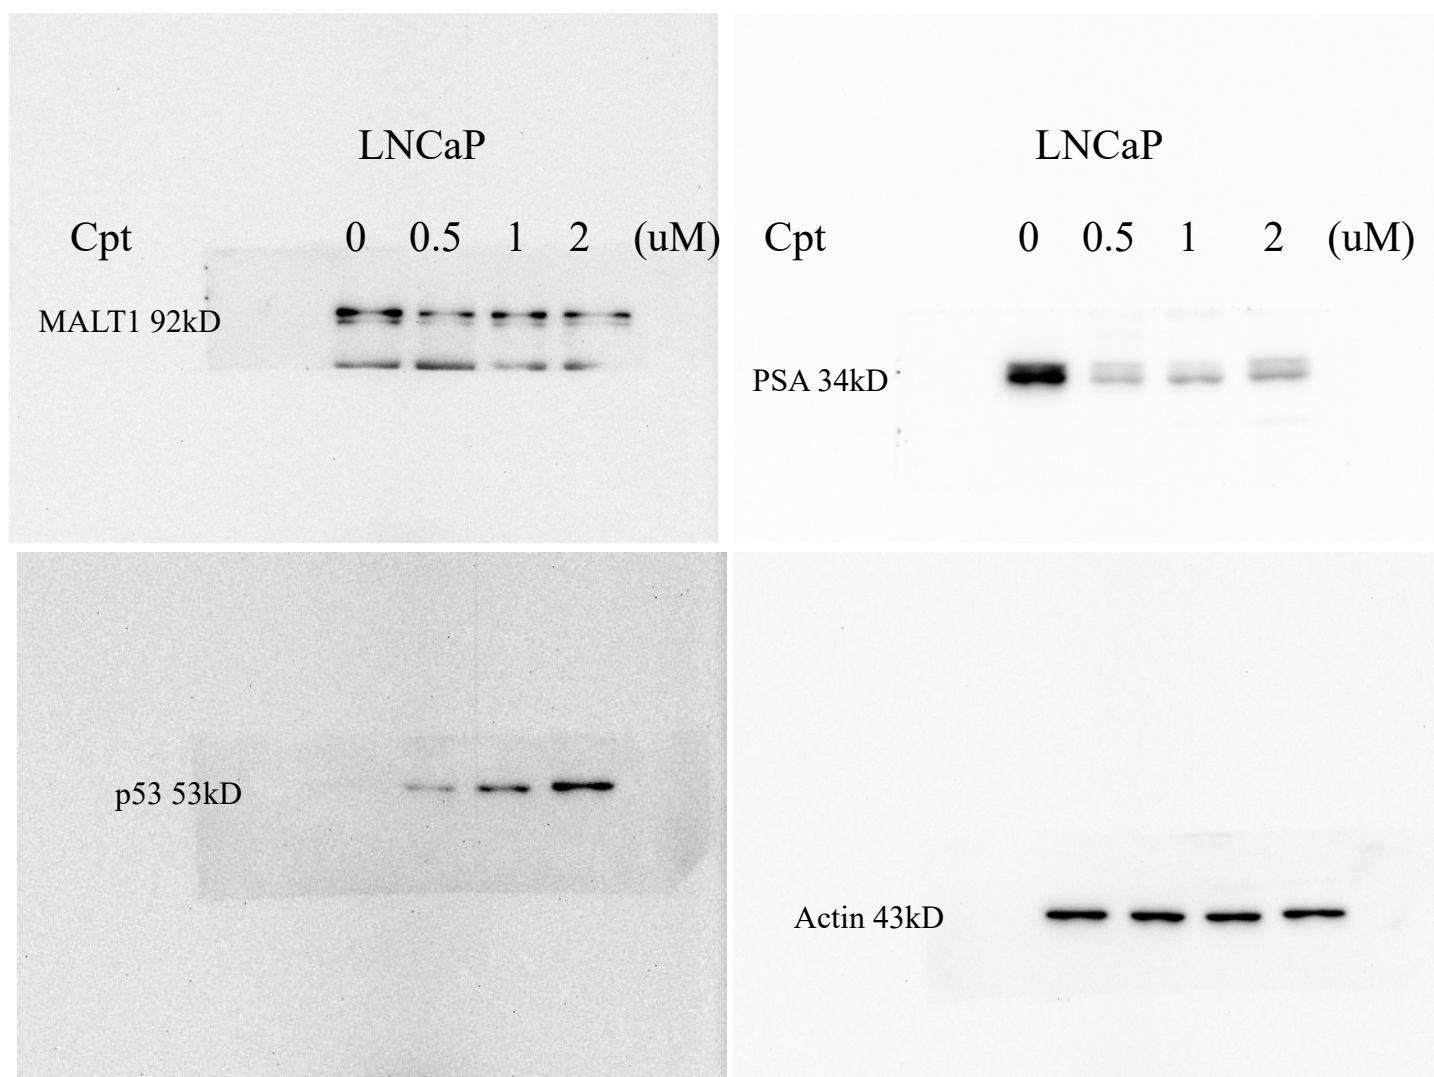

**Figure S2:** Original uncropped Western blots of figure 2

Supplement: s1 [file s1]

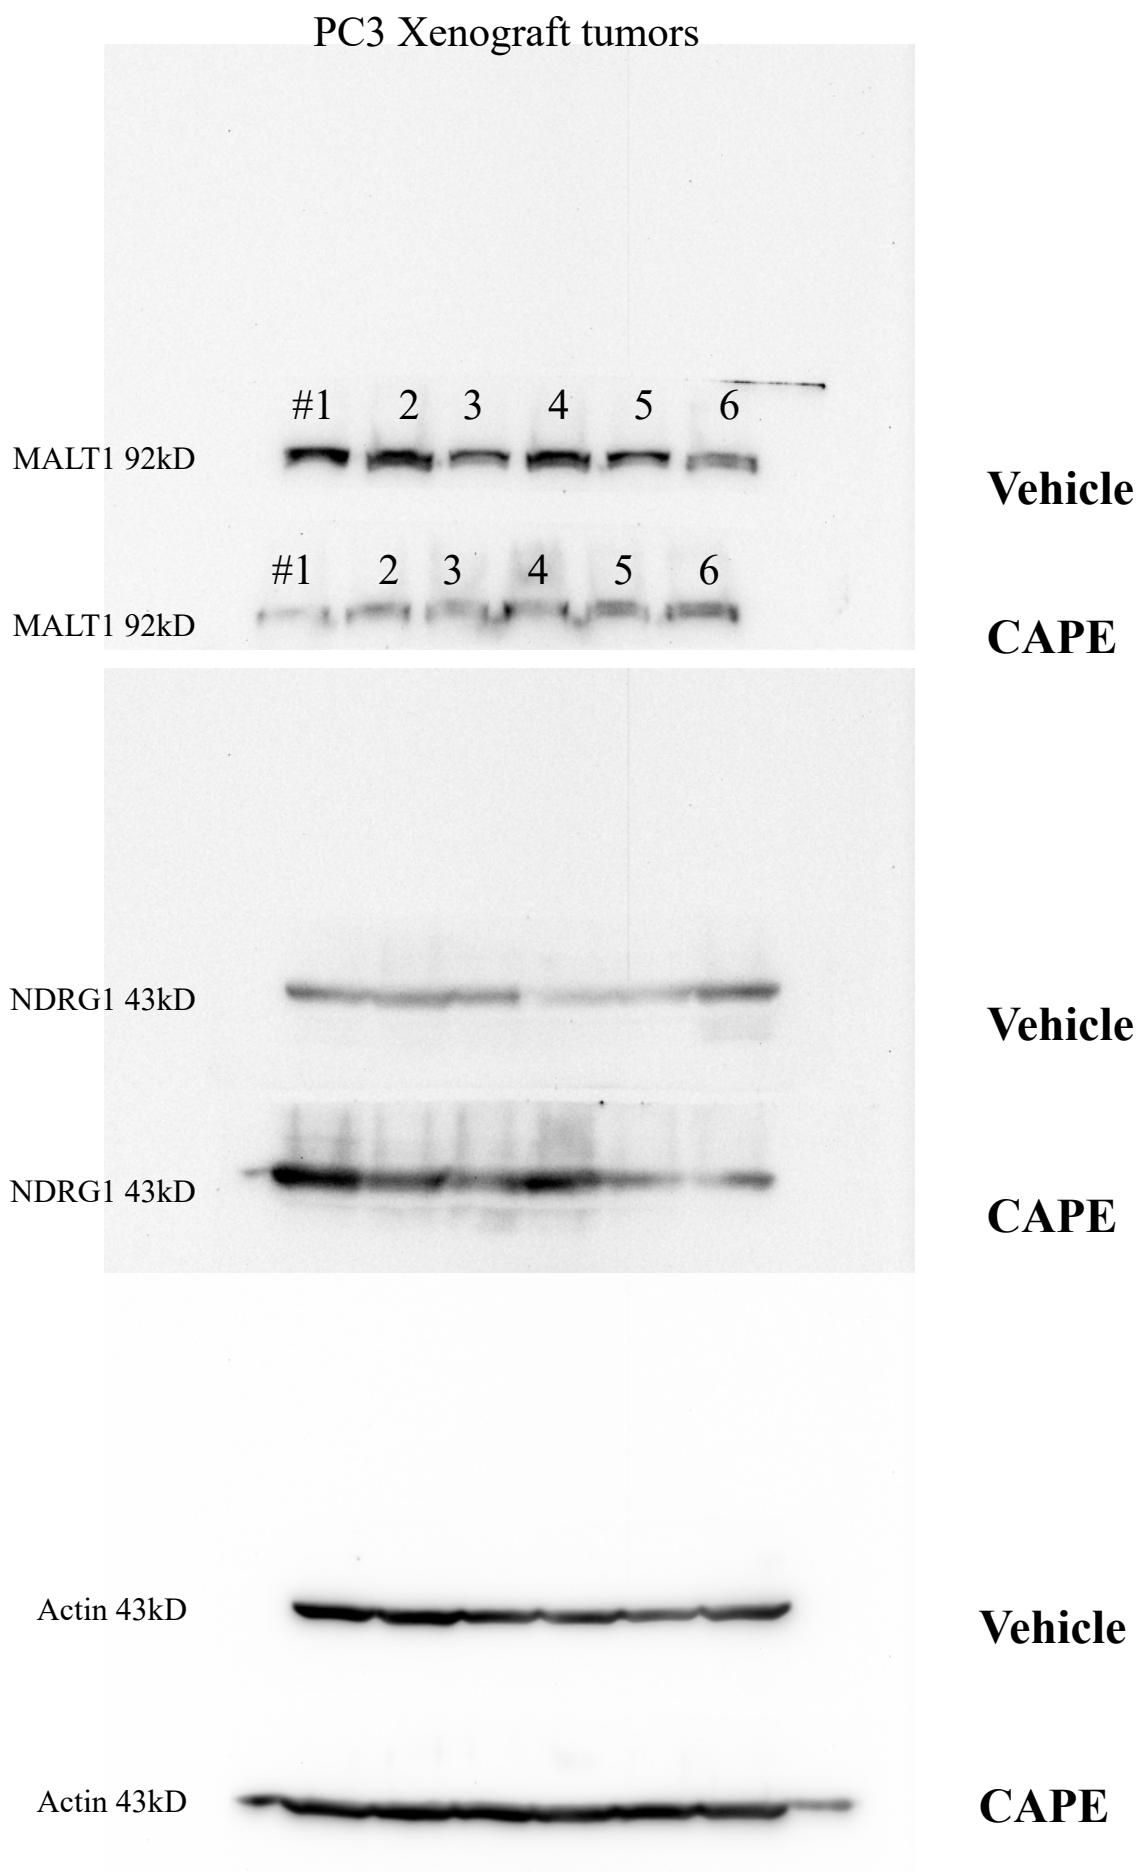

**Figure S6:** Original uncropped Western blots of figure 7

Supplement: s1 [file s1]
